# Supplementary material for: Changes in body composition, bone metabolism, strength, and skill-specific performance resulting from 16-weeks of HIFT
Source: PubMed Central journal article supplement (PMC6003684; doi:10.1371/journal.pone.0198324), 2018-06-15
Supplement: pone.0198324.s002.pdf [file pone.0198324.s002.pdf]

|                                            | Weights (lbs)      | Time (min) | Reps  | Distance    | Sets  | Sums | NOTES                    |
|--------------------------------------------|--------------------|------------|-------|-------------|-------|------|--------------------------|
| 105                                        |                    |            |       |             |       |      |                          |
| 100                                        |                    |            |       |             |       |      |                          |
| Day 1                                      |                    |            |       |             |       |      |                          |
| <b>Strength:</b>                           |                    |            |       |             |       |      |                          |
| Single Arm DB Press                        |                    |            | 8each |             | 4     |      | 1 Press (DB, Single)     |
| DB Bench Row                               |                    |            | 8each |             | 4     |      | 1 Bench Row (DB)         |
| <b>MetCon:</b>                             |                    |            |       |             |       |      |                          |
| Run 400 m                                  |                    |            |       | 400m        | 4     |      | 4 Rounds                 |
| Power Clean (135/85, 95/65) x 10           | (135/85, 95/65)    |            | 10    |             | 4     |      | 16 Clean (Power)         |
| Sit-ups x 20                               |                    |            | 20    |             | 4     |      | 16 Sit-ups               |
| Day 2                                      |                    |            |       |             |       |      |                          |
| <b>Testing:</b>                            |                    |            |       |             |       |      |                          |
| Thrusters (115/75) x 20 reps               | (115/75)           |            | 4     | 20          |       |      | 20 Thrusters             |
| Rest x 2 mins                              |                    |            | 2     |             |       |      |                          |
| Max effort DU's x 2 mins                   |                    |            | 2     |             | 1     |      | 26 DU's                  |
| Rest 2 mins                                |                    |            | 2     |             |       |      |                          |
| Max effort KB Swings (24/16) x 2 mins      | (24/16)            |            | 2     |             | 1     |      | 19 KB Swings             |
| Rest x 2 mins                              |                    |            | 2     |             |       |      |                          |
| Max effort Burpees to 45lb. Plate x 3 mins | 45lb. Plate        |            | 3     |             | 1     | 3    | Burpees (To Plate)       |
| Day 3                                      |                    |            |       |             |       |      |                          |
| <b>Strength:</b>                           |                    |            |       |             |       |      |                          |
| Snatch balance & OHS 1 by 3 x 5            |                    |            | 1     |             | 5     |      | 14 Snatch                |
| OHS 3 x 5                                  |                    |            | 3     |             | 5     |      | 6 Squat (Overhead)       |
| <b>MetCon:</b>                             |                    |            |       |             |       |      |                          |
| 3 rounds                                   |                    |            |       |             |       |      |                          |
| Pull-ups x 15                              |                    |            | 15    |             | 3     |      | 22 Pull-ups              |
| HSPU x 10                                  |                    |            | 10    |             | 3     |      | 15 HSPU                  |
| DL (295/200, 245/175) x 5                  | (295/200, 245/175) |            | 5     |             | 3     |      | 27 Deadlift              |
| Day 4                                      |                    |            |       |             |       |      |                          |
| <b>Strength:</b>                           |                    |            |       |             |       |      |                          |
| Front Squat x 5RM                          | 5 RM               |            | 20    |             |       |      | 17 Squat (Front)         |
| <b>MetCon: 15 min AMRAP</b>                |                    |            |       |             |       |      |                          |
| Row 350 m                                  |                    |            | 15    | 350m        | AMRAP |      | 26 Row                   |
| Burpees x 15                               |                    |            | 15    |             | AMRAP |      | 23 Burpees               |
| Day 5                                      |                    |            |       |             |       |      |                          |
| <b>Strength: EMOM</b>                      |                    |            |       |             |       |      |                          |
| Power Clean & Jerk x 3 @ 60-70%            | (60-70%)           |            | 7     | 3           |       |      | 2 Clean (Power) and Jerk |
| <b>MetCon: 4 Rounds</b>                    |                    |            |       |             |       |      |                          |
| Ring Chin-ups x 8                          |                    |            | 8     |             | 4     |      | 1 Chin-ups (Ring)        |
| OH Walking DB Lunge x 10                   | (35/25, 30/20)     |            | 10    |             | 4     |      | 4 Lunges (OH Walking)    |
| Day 6                                      |                    |            |       |             |       |      |                          |
| <b>Strength:</b>                           |                    |            |       |             |       |      |                          |
| DL x 2/set                                 | 60%                |            | 2     |             | 1     |      | Deadlift                 |
|                                            | 65%                |            | 2     |             | 1     |      |                          |
|                                            | 70%                |            | 2     |             | 1     |      |                          |
|                                            | 75%                |            | 2     |             | 1     |      |                          |
|                                            | 80%                |            | 2     |             | 1     |      |                          |
| <b>MetCon: 21-15-9-6-3</b>                 |                    |            |       |             |       |      |                          |
| DL (205/135)                               | (205/135)          |            |       | 21-15-9-6-3 |       |      | Deadlift                 |
| WB (20/14)                                 | (20/14)            |            |       | 21-15-9-6-3 |       |      | 15 Wall Balls            |
| Sit-ups                                    |                    |            |       | 21-15-9-6-3 |       |      | Sit-ups                  |
| Day 7                                      |                    |            |       |             |       |      |                          |
| <b>Strength:</b>                           |                    |            |       |             |       |      |                          |
| Squat                                      | (70-75%)           |            | 5     |             | 5     |      | 18 Squat                 |
| <b>MetCon:</b>                             |                    |            |       |             |       |      |                          |
| Squat Cleans                               | (25/15)            |            |       | 200m        | 1     |      | 3 Run (Plate)            |
| Plate Run                                  | (95/65)            |            | 30    |             | 1     |      | 11 Squat Clean           |
| Squat Cleans                               | (45/25)            |            |       | 200m        | 1     |      | Run (Plate)              |
| Plate Run                                  | (135/85)           |            | 20    |             | 1     |      | Squat Clean              |
| Squat Cleans                               | (25/15)            |            |       | 200m        | 1     |      | Run (Plate)              |
| Push-ups                                   | (185/115)          |            | 10    |             | 1     |      | Squat Clean              |
| DU's                                       |                    |            | 50    |             | 1     |      | 15 Push-ups              |
| T2B                                        |                    |            | 100   |             | 1     |      | DU's                     |
| DU's                                       |                    |            | 40    |             | 1     |      | 15 T2B                   |
| Box Jumps                                  |                    |            | 80    |             | 1     |      | DU's                     |
| DU's                                       |                    |            | 30    |             | 1     |      | 17 Box Jumps             |
|                                            |                    |            | 60    |             | 1     |      | DU's                     |
| Day 8                                      |                    |            |       |             |       |      |                          |
| <b>Strength:</b>                           |                    |            |       |             |       |      |                          |
| BB Walking Lunge                           | AHAP               |            |       | 20paces     | 3     |      | 3 Lunges (BB Walking)    |
| BB Walking Lunge                           | AHAP               |            |       | 10paces     | 2     |      | Lunges (BB Walking)      |
| BB Walking Lunge                           | AHAP               |            |       | 10paces     | 2     |      | Lunges (BB Walking)      |
| <b>MetCon:</b>                             |                    |            |       |             |       |      |                          |
| Double Bell KB Jerk                        | (32/20, 24/16)     |            | 15    |             | 4     |      | 2 Jerk (Double Bell KB)  |
| Single Ring, Ring Rows                     |                    |            | 15    |             | 4     |      | 6 Ring Rows (single)     |
| KB Farmer Walk                             |                    |            |       | 100m        | 4     |      | 2 Farmer Walks (KB)      |

|                           | Weights (lbs)      | Time (min) | Reps            | Distance | Sets  | Sums | NOTES                       |
|---------------------------|--------------------|------------|-----------------|----------|-------|------|-----------------------------|
| Day 9                     |                    |            |                 |          |       |      |                             |
| <b>Strength:</b>          |                    |            |                 |          |       |      |                             |
| Bench Press               | 50%                |            | 5               |          | 1     | 14   | Bench Press                 |
|                           | 60%                |            | 5               |          | 1     |      |                             |
|                           | 70%                |            | 5               |          | 1     |      |                             |
|                           | 85%                |            | 5               |          | 1     |      |                             |
|                           | 100%               |            | 3               |          | 1     |      |                             |
|                           | 70%                |            | 8               |          | 1     |      |                             |
| <b>MetCon:</b>            |                    |            |                 |          |       |      |                             |
| WB                        |                    |            | Max             |          |       |      | Wall Balls                  |
| Rest                      |                    | 3          |                 |          |       |      |                             |
| KB Swings                 | (32/24, 24/20)     |            | 10              |          | 5     |      | KB Swings                   |
| KB Goblet Squats          |                    |            | 10              |          | 5     | 3    | Squat (KB Goblet)           |
| Pull-ups                  |                    |            | 10              |          | 5     |      | Pull-ups                    |
| Day 10                    |                    |            |                 |          |       |      |                             |
| <b>Strength:</b>          |                    |            |                 |          |       |      |                             |
| Squat Clean               | ?                  |            | 1               |          | 5     |      | Squat Clean                 |
| Front Squat               | ?                  |            | 2               |          | 5     |      | Squat (Front)               |
| Jerk                      | ?                  |            | 1               |          | 5     | 4    | Jerk                        |
| <b>MetCon:</b>            |                    |            |                 |          |       |      |                             |
| HSPU                      |                    |            | 8               |          | 4     |      | HSPU                        |
| Box Jumps                 |                    |            | 8               |          | 4     |      | Box Jumps                   |
| Push-ups                  |                    |            | 8               |          | 4     |      | Push-ups                    |
| DU's                      |                    |            | 25              |          | 4     |      | DU's                        |
| Day 11                    |                    |            |                 |          |       |      |                             |
| <b>Strength:</b>          |                    |            |                 |          |       |      |                             |
| Back Squat                | 50%                |            | 12              |          | 1     |      | Squat                       |
|                           | increase 10-20lbs. |            | 10              |          | 1     |      |                             |
|                           | increase 10-20lbs. |            | 8               |          | 1     |      |                             |
|                           | increase 10-20lbs. |            | 6               |          | 1     |      |                             |
|                           | increase 10-20lbs. |            | 4               |          | 1     |      |                             |
|                           | increase 10-20lbs. |            | 2               |          | 1     |      |                             |
| <b>MetCon:</b>            |                    |            |                 |          |       |      |                             |
| Run                       |                    | 20         |                 | 400m     | AMRAP |      | Run                         |
| Burpees to 45/25lb. Plate | 45/25lb. Plate     | 20         | 5               |          | AMRAP |      | Burpees (To Plate)          |
| Walking Lunge             |                    | 20         | 16              |          | AMRAP | 1    | Lunges (Walking)            |
| Burpees to Plate          | 45/25lb. Plate     | 20         | 5               |          | AMRAP |      | Burpees (To Plate)          |
| Day 12                    |                    |            |                 |          |       |      |                             |
| <b>Strength:</b>          |                    |            |                 |          |       |      |                             |
| 3 Position Snatch         | 50%                |            | 1               |          | 3     |      | 1 Snatch (3 Position)       |
| Hang Snatch               | ?                  |            | 2               |          | 3     |      | 5 Snatch (Hang)             |
| Snatch                    | ?                  |            | 1               |          | 3     |      | Snatch                      |
| <b>MetCon:</b>            |                    |            |                 |          |       |      |                             |
| Power Cleans              | (185/25, 135/85)   |            | 21, 15, 9       |          | 3     |      | Clean (Power)               |
| S2OH                      |                    |            | 21, 15, 9       |          | 3     |      | Shoulder 2 Over-Head (S2OH) |
| Day 13                    |                    |            |                 |          |       |      |                             |
| <b>Strength:</b>          |                    |            |                 |          |       |      |                             |
| Sumo DL                   | 60%                |            | 5               |          | 1     |      | 2 Deadlift (Sumo)           |
|                           | 70%                |            | 4               |          | 1     |      |                             |
|                           | 75-85%             |            | 3               |          | 3     |      |                             |
| <b>MetCon:</b>            |                    |            |                 |          |       |      |                             |
| Ladder                    |                    | 12Min.     |                 |          |       |      |                             |
| Strict Chin-ups           |                    |            |                 |          |       |      | 12 Chin-ups (Strict)        |
| HRPU                      |                    |            | 2,4,6,8,10...   |          |       |      | 8 HRPU                      |
| Sit-Ups                   |                    |            | 4,8,12,16,20... |          |       |      | Sit-ups                     |
| Day 14                    |                    |            |                 |          |       |      |                             |
| <b>Strength:</b>          |                    |            |                 |          |       |      |                             |
| Front Squat:              | 60%                |            | 5               |          | 1     |      | Squat (Front)               |
|                           | 70%                |            | 5               |          | 1     |      |                             |
|                           | 75%                |            | 5               |          | 1     |      |                             |
|                           | 80%                |            | 5               |          | 1     |      |                             |
|                           | 85%                |            | 3               |          | 1     |      |                             |
|                           | 75%                |            | 8               |          | 1     |      |                             |
| <b>MetCon:</b>            |                    |            |                 |          |       |      |                             |
| Power Snatch              | (115/75, 95/65)    |            | 10              |          | 5     |      | 5 Snatch (Power)            |
| Thrusters                 |                    |            | 20              |          | 5     |      | Thrusters                   |
| KB Swings                 | (32/24, 24/20)     |            | 30              |          | 5     |      | KB Swings                   |
| Run                       |                    |            |                 | 200m     | 5     |      | Run                         |
| Day 15                    |                    |            |                 |          |       |      |                             |
| <b>Strength:</b>          |                    |            |                 |          |       |      |                             |
| Loaded Ring Rows          | loaded             |            | 8 to 10         |          |       |      | 2 Ring Rows                 |
| Strict T2B                |                    |            | 5 to 8          |          |       |      | 1 T2B (Strict)              |
| <b>MetCon:</b>            |                    |            |                 |          |       |      |                             |
| Handstand Holds           |                    | 30seconds  |                 |          | 4     |      | Handstand Holds             |
| Bear Crawls               |                    |            |                 | D&B      | 4     |      | 1 Bear Crawls               |
| DB Step-ups               | (35/25)            |            | 10              |          | 4     |      | 2 Step-ups (DB)             |
| Running Man Jump Rope     |                    |            | 50              |          | 4     |      | Running Man Jump Rope       |
| Day 16                    |                    |            |                 |          |       |      |                             |
| <b>Strength:</b>          |                    |            |                 |          |       |      |                             |

|                             | Weights (lbs)      | Time (min) | Reps     | Distance | Sets | Sums  | NOTES                           |
|-----------------------------|--------------------|------------|----------|----------|------|-------|---------------------------------|
| Bench Press                 | 50%                |            | 5        |          | 1    |       | Bench Press                     |
|                             | 65%                |            | 5        |          | 1    |       |                                 |
|                             | 75%                |            | 5        |          | 1    |       |                                 |
|                             | 90%                |            | 5        |          | 1    |       |                                 |
|                             | 100%               |            | 5        |          | 1    |       |                                 |
| <b>MetCon:</b>              |                    |            |          |          |      |       |                                 |
| HSPU                        |                    | 3          | max reps |          |      |       | HSPU                            |
| Scale-HRPU?                 |                    |            |          |          |      |       | HRPU                            |
| Rest                        |                    |            | 3min     |          |      |       |                                 |
| Bar Muscle Ups              |                    |            | 9        |          | 5    | AMRAP | 2 Muscle Ups                    |
| Power Cleans                | (185/125, 135/95)  |            | 9        |          | 7    | AMRAP | Clean (Power)                   |
|                             |                    |            |          |          | 9    | AMRAP | Burpees                         |
| Burpee Box Jumps            | (30/24, 24/20)     |            | 9        |          | 9    | AMRAP | Box Jumps                       |
| Day 17                      |                    |            |          |          |      |       |                                 |
| <b>Strength:</b>            |                    |            |          |          |      |       |                                 |
| Snatch                      | (75-85%)           |            | 1        |          | 10   |       | Snatch                          |
| <b>MetCon:</b>              |                    |            |          |          |      |       |                                 |
| KB Swings                   | (32/24, 24/20)     |            | 20       |          | 4    |       | KB Swings                       |
| Goblet Squat                |                    |            | 15       |          | 4    |       | Squat (KB Goblet)               |
| OH Single Arm Walking Lunge | Single Arm         |            |          | 10paces  | 4    |       | 2 Lunges (OH Walking, Single)   |
| Day 18                      |                    |            |          |          |      |       |                                 |
| <b>Strength:</b>            |                    |            |          |          |      |       |                                 |
| Front Squat                 | 50%                |            | 5        |          | 1    |       | Squat (Front)                   |
|                             | 60%                |            | 5        |          | 1    |       |                                 |
|                             | 70%                |            | 5        |          | 1    |       |                                 |
|                             | 85%                |            | 5        |          | 1    |       |                                 |
|                             | 95%                |            | 5        |          | 1    |       |                                 |
| <b>MetCon:</b>              |                    |            |          |          |      |       |                                 |
| Row                         |                    |            |          | 1000m    | 1    |       | Row                             |
| Wall Balls                  |                    |            | 25       |          | 3    |       | Wall Balls                      |
| DL                          | (225/155, 185/125) |            | 15       |          | 3    |       | Deadlift                        |
| T2B                         |                    |            | 10       |          | 3    |       | T2B                             |
| Day 19                      |                    |            |          |          |      |       |                                 |
| <b>Strength:</b>            |                    |            |          |          |      |       |                                 |
| Power Cleans                | (185/125, 135/95)  |            | 12       |          | 5    |       | Clean (Power)                   |
| Bar Over Burpees            | Bar Over           |            | 12       |          | 5    |       | 1 Burpees (Bar Over)            |
| <b>MetCon:</b>              |                    |            |          |          |      |       |                                 |
| S2OH                        | (185/125, 135/95)  |            | 5        |          | 5    |       | Shoulder 2 Over-Head (S2OH)     |
| Ring Dips                   |                    |            | 7        |          | 5    |       | 7 Ring Dips                     |
| DU's                        |                    |            | 35       |          | 5    |       | DU's                            |
| Day 20                      |                    |            |          |          |      |       |                                 |
| <b>Strength:</b>            |                    |            |          |          |      |       |                                 |
| DL                          | 50%                |            | 5        |          | 1    |       | Deadlift                        |
|                             | 60%                |            | 4        |          | 1    |       |                                 |
|                             | 70%                |            | 3        |          | 5    |       |                                 |
| <b>MetCon:</b>              |                    |            |          |          |      |       |                                 |
| Power Snatch                | (95/65, 75/55)     |            | 15       |          | 3    |       | Snatch (Power)                  |
| Single Ring-Ring Rows       |                    |            | 15       |          | 3    |       | Ring Rows (single)              |
| Sit-ups w/DB                | (35/25, 30/20)     |            | 15       |          | 3    |       | 1 Sit-ups (DB)                  |
| Day 21                      |                    |            |          |          |      |       |                                 |
| <b>Strength:</b>            |                    |            |          |          |      |       |                                 |
| Back Squat                  | 50%                |            | 10       |          | 1    |       | Squat                           |
|                             | 60%                |            | 8        |          | 1    |       |                                 |
|                             | 70%                |            | 6        |          | 4    |       |                                 |
| <b>MetCon:</b>              |                    |            |          |          |      |       |                                 |
| Pull-ups                    |                    |            | 25       |          | 1    |       | Pull-ups                        |
| DL                          | (135/95)           |            | 50       |          | 1    |       | Deadlift                        |
| Push-ups                    |                    |            | 50       |          | 1    |       | Push-ups                        |
| Box Jumps                   |                    |            | 50       |          | 1    |       | Box Jumps                       |
| Floor Sweeps                |                    |            | 50       |          | 1    |       | 5 Floor Sweeps                  |
| KB Clean and Press          | (24/16)            |            | 50       |          | 1    |       | 1 Clean (KB) and Press          |
| Pull-ups                    |                    |            | 25       |          | 1    |       | Pull-ups                        |
| Day 22                      |                    |            |          |          |      |       |                                 |
| <b>Strength:</b>            |                    |            |          |          |      |       |                                 |
| Single Arm DB/KB OHS        | ?                  |            | 8each    |          | 3    |       | Squat (Overhead, single, DB/KB) |
| KB TGU (AHAP)               | (AHAP)             |            | 2each    |          | 3    |       | TGU (KB)                        |
| <b>MetCon:</b>              |                    |            |          |          |      |       |                                 |
| Run                         |                    | 20         |          | 200m     |      |       | Run                             |
| Strict Chin-ups             |                    | 20         | 5        |          |      |       | Chin-ups (Strict)               |
| Run                         |                    | 20         |          | 400m     |      |       | Run                             |
| DB 1/2 Man maker            | (35/25, 30/20)     | 20         | 5        |          |      |       | DB 1/2 Man Maker                |
| Day 23                      |                    |            |          |          |      |       |                                 |
| <b>Strength:</b>            |                    |            |          |          |      |       |                                 |
| Bench Press                 | 50%                |            | 5        |          | 1    |       | Bench Press                     |
|                             | 65%                |            | 5        |          | 1    |       |                                 |
|                             | 80%                |            | 5        |          | 1    |       |                                 |
|                             | 95%                |            | 5        |          | 1    |       |                                 |
|                             | 105%               |            | 3        |          | 1    |       |                                 |
|                             | 80%                |            | 8        |          | 1    |       |                                 |
| <b>MetCon:</b>              |                    | 10min cap  |          |          |      |       |                                 |
| HSPU                        |                    |            | 10       |          | 4    |       | HSPU                            |

|                                      | Weights (lbs)              | Time (min)   | Reps          | Distance | Sets        | Sums | NOTES                       |
|--------------------------------------|----------------------------|--------------|---------------|----------|-------------|------|-----------------------------|
| DL                                   | ?                          |              | 10            |          | 4           |      | Deadlift                    |
| Day 24                               |                            |              |               |          |             |      |                             |
| <b>Strength:</b>                     |                            |              |               |          |             |      |                             |
| Hang Clean                           |                            |              | 1             |          | 6           |      | 2 Clean (Hang)              |
| Clean                                |                            |              | 1             |          | 6           |      | 2 Clean                     |
| Jerk                                 |                            |              | 1             |          | 6           |      | Jerk                        |
| <b>MetCon:</b>                       |                            |              |               |          |             |      |                             |
| Wall Balls                           | ?                          |              | 21-15-9-15-21 |          |             |      | Wall Balls                  |
| KB Swings                            | ?                          |              | 21-15-9-15-21 |          |             |      | KB Swings                   |
| Unbroken DU's                        | Unbroken                   |              | 25            |          |             |      | DU's                        |
| Day 25                               |                            |              |               |          |             |      |                             |
| <b>Strength:</b>                     |                            |              |               |          |             |      |                             |
| Front Squat                          | 60%                        |              | 5             |          | 1           |      | Squat (Front)               |
|                                      | 70%                        |              | 5             |          | 1           |      |                             |
|                                      | 80%                        |              | 5             |          | 1           |      |                             |
|                                      | 90%                        |              | 5             |          | 1           |      |                             |
|                                      | 100%                       |              | 3             |          | 1           |      |                             |
|                                      | 80%                        |              | 8             |          | 1           |      |                             |
| <b>MetCon:</b>                       |                            |              |               |          |             |      |                             |
| Pull-ups                             |                            |              | 10            |          | 3           |      | Pull-ups                    |
| Box Jumps                            |                            |              | 10            |          | 3           |      | Box Jumps                   |
| T2B                                  |                            |              | 10            |          | 3           |      | T2B                         |
|                                      |                            |              | 10            |          | 3           |      |                             |
| Burpee Box Jumps                     |                            |              | 10            |          | 3           |      | 2 Burpee Box Jumps          |
| Day 26                               |                            |              |               |          |             |      |                             |
| <b>Strength:</b>                     |                            |              |               |          |             |      |                             |
| Pause Snatch (Pos. 2)                | Pause @ pos. 2             |              | 2             |          | 6           |      | Snatch                      |
| <b>MetCon:</b>                       |                            |              |               |          |             |      |                             |
| Row                                  |                            |              |               | 1500m    | 1           |      | Row                         |
| KB Double Bell Squat (32/20, 24/16)  | (32/20, 24/16)             |              | 30            |          | 1           |      | Squat (KB/DB)               |
| Push-ups                             | 45lb                       |              | 30            |          | 1           |      | Push-ups                    |
| KB double bell lunge                 | ?                          |              | 30            |          | 1           |      | Lunges (KB/DB)              |
| Day 27                               |                            |              |               |          |             |      |                             |
| <b>Strength:</b>                     |                            |              |               |          |             |      |                             |
| Clean Pulls                          |                            |              | 3             |          | 6           |      | 1 Clean (Pull)              |
| <b>MetCon:</b>                       |                            |              |               |          |             |      |                             |
| Run                                  |                            |              |               | 400m     | 4           |      | Run                         |
| Thrusters                            | (135/85, 95/65)            |              | 10            |          | 4           |      | Thrusters                   |
| Sit-ups                              |                            |              | 20            |          | 4           |      | Sit-ups                     |
| Day 28                               |                            |              |               |          |             |      |                             |
| <b>Strength:</b>                     |                            |              |               |          |             |      |                             |
| Rope Climbs                          |                            | 20           |               |          | 1           |      | 7 Rope Climbs               |
| Rx                                   |                            |              | 15accents     |          | 1           |      |                             |
| FB (legless + traditional)           |                            |              | 5 + 10        |          | 1           |      | FB (legless + traditional)  |
| <b>MetCon:</b>                       |                            |              |               |          |             |      |                             |
| DB Bench Press                       | (35/25, 30/20)             |              | 40            |          | 1           |      | 3 Bench Press (DB)          |
| Squats                               | 40%                        |              | 30            |          | 1           |      | Squat                       |
| Strict Chin-ups                      |                            |              | 20            |          | 1           |      | Chin-ups (Strict)           |
| DB Bench Press                       |                            |              | 20            |          | 1           |      | Bench Press (DB)            |
| Squats                               | 60%                        |              | 15            |          | 1           |      | Squat                       |
| Strict Chin-ups                      |                            |              | 10            |          | 1           |      | Chin-ups (Strict)           |
| Day 29                               |                            |              |               |          |             |      |                             |
| <b>Strength:</b>                     |                            |              |               |          |             |      |                             |
| Pistols                              |                            | (10min EMOM) | 5each         |          | Odd Minute  |      | Squat (Pistol)              |
| Strict HSPU                          |                            |              | 5             |          | Even Minute |      | 2 HSPU (Strict)             |
| <b>MetCon:</b>                       |                            |              |               |          |             |      |                             |
| Run                                  |                            |              | 800m          |          | 1           |      | Run                         |
| Double Bell KB Swings (32/20, 24/16) | double bell (32/20, 24/16) |              | 10            |          | 4           |      | KB Swings                   |
| Burpees                              |                            |              | 10            |          | 4           |      | Burpees                     |
| Run                                  |                            |              | 800m          |          | 1           |      | Run                         |
| Day 30                               |                            |              |               |          |             |      |                             |
| NO W.O.D. - Holiday                  |                            |              |               |          |             |      |                             |
| Day 31                               |                            |              |               |          |             |      |                             |
| <b>Strength:</b>                     |                            |              |               |          |             |      |                             |
| Squat Clean + Thruster               |                            |              | 1             |          | 6           |      | Squat Clean                 |
|                                      |                            |              | 3             |          | 6           |      | Thrusters                   |
| <b>MetCon:</b>                       |                            |              |               |          |             |      |                             |
| S2OH                                 | (135/85, 95/65)            |              | 15-12-9       |          |             |      | Shoulder 2 Over-Head (S2OH) |
| Pull-ups                             |                            |              | 15-12-9       |          |             |      | Pull-ups                    |
| S2OH                                 |                            |              | 12,9,6        |          |             |      | Shoulder 2 Over-Head (S2OH) |
| Pull-ups                             |                            |              | 12,9,6        |          |             |      | Pull-ups                    |
| S2OH                                 |                            |              | 9,6,3         |          |             |      | Shoulder 2 Over-Head (S2OH) |
| Pull-ups                             |                            |              | 9,6,3         |          |             |      | Pull-ups                    |
| Day 32                               |                            |              |               |          |             |      |                             |
| <b>Strength:</b>                     |                            |              |               |          |             |      |                             |
| Back Squat @ 80%                     | @80%                       |              | 2             |          | 6           |      | Squat                       |

|                                        | Weights (lbs)          | Time (min)    | Reps  | Distance | Sets      | Sums | NOTES                            |
|----------------------------------------|------------------------|---------------|-------|----------|-----------|------|----------------------------------|
| <b>MetCon:</b>                         |                        | (For Time)    |       |          |           |      |                                  |
| DU's                                   |                        |               | 100   |          | 1         |      | DU's                             |
| Row                                    |                        |               | 1000m |          | 1         |      | Row                              |
| KB Swings (32/20, 24/16)               | (32/20, 24/16)         |               | 100   |          | 1         |      | KB Swings                        |
| Air Squats                             |                        |               | 100   |          | 1         |      | 3 Squat (Air)                    |
| Day 33                                 |                        |               |       |          |           |      |                                  |
| <b>Strength:</b>                       |                        |               |       |          |           |      |                                  |
| Snatch Pulls + Snatch                  |                        |               | 2     |          | 5         |      | 2 Snatch Pull                    |
|                                        |                        |               | 2     |          |           |      | Snatch                           |
| <b>MetCon:</b>                         |                        |               |       |          |           |      |                                  |
| Hang Power Cleans (155/105, 115/85)    | (155/105, 115/85)      |               | 10    |          | 3         |      | 4 Clean (Hang Power)             |
| BB OH Walking Lunges (155/105, 115/85) | (155/105, 115/85)      |               | 10    |          | 3         |      | Lunges (OH Walking)              |
| Lateral Burpees over bar               | Bar Over               |               | 10    |          | 3         |      | 2 Burpees (Lateral Bar Over)     |
| Day 34                                 |                        |               |       |          |           |      |                                  |
| <b>Strength:</b>                       |                        | (6min EMOM)   |       |          |           |      |                                  |
| 3 DL (Increase 5% ea. Min.)            | (Increase 5% ea. Min.) |               | 3     |          | 6         |      | Deadlift                         |
| <b>MetCon:</b>                         |                        |               |       |          |           |      |                                  |
| Squat Cleans (205/135, 155/95)         | (205/135, 155/95)      |               | 3     |          | 5         |      | Squat Clean                      |
| HSPU                                   |                        |               | 6     |          | 5         |      | HSPU                             |
| Bowtie situps (35/25, 30/20)           | (35/25, 30/20)         |               | 9     |          | 5         |      | 3 Sit-ups (Bowtie)               |
| Day 35                                 |                        |               |       |          |           |      |                                  |
| <b>Strength:</b>                       |                        |               |       |          |           |      |                                  |
| Front Squat                            |                        |               |       |          |           |      |                                  |
|                                        | 60%                    |               | 5     |          | 1         |      | Squat (Front)                    |
|                                        | 65%                    |               | 5     |          | 1         |      |                                  |
|                                        | 70%                    |               | 5     |          | 1         |      |                                  |
|                                        | 75%                    |               | 5     |          | 1         |      |                                  |
|                                        | 80%                    |               | 5     |          | 1         |      |                                  |
|                                        | 70%                    |               | 8     |          | 1         |      |                                  |
| <b>MetCon:</b>                         |                        |               |       |          |           |      |                                  |
| Run                                    |                        |               | 200m  |          | 3         |      | Run                              |
| Slam Balls                             |                        |               | 20    |          | 3         |      | 5 Ball Slams                     |
| No Rest                                |                        |               |       |          |           |      |                                  |
| Run                                    |                        |               | 400m  |          | 3         |      | Run                              |
| Strict Chin-ups                        |                        |               | 8     |          | 3         |      | Chin-ups (Strict)                |
| Push-ups                               |                        |               | 12    |          | 3         |      | Push-ups                         |
| Day 36                                 |                        |               |       |          |           |      |                                  |
| <b>Strength:</b>                       |                        | (15min. EMOM) |       |          |           |      |                                  |
| DB or KB SLRDL                         |                        |               | 5each |          | Min.1 (5) |      | RDL (DB/KB, single)              |
| Single arm DB or KB Shoulder Press     |                        |               | 5each |          | Min.2 (5) |      | 1 Shoulder Press (DB/KB, Single) |
| Single Arm Bench Row                   |                        |               | 5each |          | Min.3 (5) |      | 1 Bench Row (single)             |
| <b>MetCon:</b>                         |                        |               |       |          |           |      |                                  |
| Row                                    |                        |               | 250m  |          | 5         |      | Row                              |
| Burpees                                |                        |               | 10    |          | 5         |      | Burpees                          |
| Single arm KB Swings                   |                        |               | 20    |          | 5         |      | 5 KB Swings (single)             |
| Day 37                                 |                        |               |       |          |           |      |                                  |
| <b>Strength:</b>                       |                        |               |       |          |           |      |                                  |
| Bench Press                            |                        |               |       |          |           |      | Bench Press                      |
|                                        | 65%                    |               | 5     |          | 1         |      |                                  |
|                                        | 70%                    |               | 5     |          | 1         |      |                                  |
|                                        | 75%                    |               | 5     |          | 1         |      |                                  |
|                                        | 80%                    |               | 5     |          | 1         |      |                                  |
|                                        | 85%                    |               | 5     |          | 1         |      |                                  |
|                                        | 75%                    |               | 8     |          | 1         |      |                                  |
| <b>MetCon:</b>                         |                        |               |       |          |           |      |                                  |
| Power Clean (135/85, 95/65)            | (135/85, 95/65)        |               | 15    |          | 1         |      | Clean (Power)                    |
| Thrusters                              |                        |               | 15    |          | 1         |      | Thrusters                        |
| DL                                     |                        |               | 15    |          | 1         |      | Deadlift                         |
| Power Clean (155/105, 115/85)          | (155/105, 115/85)      |               | 9     |          | 1         |      | Clean (Power)                    |
| Thrusters                              |                        |               | 9     |          | 1         |      | Thrusters                        |
| DL                                     |                        |               | 9     |          | 1         |      | Deadlift                         |
| Power Clean (175/125, 135/105)         | (175/125, 135/105)     |               | 6     |          | 1         |      | Clean (Power)                    |
| Thrusters                              |                        |               | 6     |          | 1         |      | Thrusters                        |
| DL                                     |                        |               | 6     |          | 1         |      | Deadlift                         |
| Day 38                                 |                        |               |       |          |           |      |                                  |
| <b>Strength:</b>                       |                        |               |       |          |           |      |                                  |
| Hang Power Snatch + Power Snatch       |                        |               | 2     |          | 6         |      | 2 Snatch (Power)                 |
|                                        |                        |               |       |          |           |      | 2 Snatch (Hang Power)            |
| <b>MetCon:</b>                         |                        | (15min AMRAP) |       |          |           |      |                                  |
| Feet elevated Push-ups                 | Feet elevated          |               | 10    |          | AMRAP     |      | Push-ups                         |
| sit-ups                                |                        |               | 15    |          | AMRAP     |      | Sit-ups                          |
|                                        |                        |               | 1     |          | 6         |      | Snatch (Power)                   |
| KB Snatch (32/20, 24/16)               | (32/20, 24/16)         |               | 20    |          | AMRAP     |      | 2 Snatch (KB)                    |
| Run                                    |                        |               | 200m  |          | AMRAP     |      | Run                              |
| Day 39                                 |                        |               |       |          |           |      |                                  |
| <b>Strength:</b>                       |                        |               |       |          |           |      |                                  |
| Back Squat @ 75%                       | @ 75%                  |               | 3     |          | 6         |      | Squat                            |

|                                         | Weights (lbs)      | Time (min)    | Reps    | Distance | Sets  | Sums | NOTES                         |
|-----------------------------------------|--------------------|---------------|---------|----------|-------|------|-------------------------------|
| <b>MetCon:</b>                          |                    |               |         |          |       |      |                               |
| Unbroken DU's                           |                    |               | 30      |          | 4     |      | DU's                          |
| Wall Balls (30/20, 20/14)               | (30/20, 20/14)     |               | 15      |          | 4     |      | Wall Balls                    |
| Pull-ups                                |                    |               | 10      |          | 4     |      | Pull-ups                      |
| Day 40                                  |                    |               |         |          |       |      |                               |
| <b>Strength:</b>                        |                    |               |         |          |       |      |                               |
| Jerks                                   |                    |               | 3       |          | 5     |      | Jerk                          |
| <b>MetCon:</b>                          |                    |               |         |          |       |      |                               |
| Row                                     |                    | (8min. AMRAP) | 200m    |          | AMRAP |      | Row                           |
| HSPU                                    |                    |               | 8       |          | AMRAP |      | HSPU                          |
| DB Walking Lunges (35/25, 30/20)        | (35/25, 30/20)     |               | 16paces |          | AMRAP |      | Lunges (DB Walking)           |
| Day 41                                  |                    |               |         |          |       |      |                               |
| <b>Strength:</b>                        |                    |               |         |          |       |      |                               |
| DL                                      |                    |               |         |          |       |      | Deadlift                      |
|                                         | 60%                |               | 5       |          | 1     |      |                               |
|                                         | 65%                |               | 4       |          | 2     |      |                               |
|                                         | 70%                |               | 3       |          | 2     |      |                               |
|                                         | 75%                |               | 2       |          | 2     |      |                               |
|                                         | 80%                |               | 1       |          | 2     |      |                               |
| <b>MetCon:</b>                          |                    |               |         |          |       |      |                               |
| Burpees                                 |                    | (For time)    | 10      |          | 1     |      | Burpees                       |
| T2B                                     |                    |               | 20      |          | 1     |      | T2B                           |
| Box Jumps                               |                    |               | 30      |          | 1     |      | Box Jumps                     |
| KB Swings (32/24, 24/20)                | (32/24, 24/20)     |               | 40      |          | 1     |      | KB Swings                     |
| KB Loaded Step-up                       | Loaded             |               | 30      |          | 1     |      | 2 Step-ups (KB)               |
| T2B                                     |                    |               | 20      |          | 1     |      | T2B                           |
| Burpees                                 |                    |               | 10      |          | 1     |      | Burpees                       |
| Day 42                                  |                    |               |         |          |       |      |                               |
| <b>Strength:</b>                        |                    |               |         |          |       |      |                               |
| Front Squat                             |                    |               |         |          |       |      | Squat (Front)                 |
|                                         | 70%                |               | 5       |          | 1     |      |                               |
|                                         | 80%                |               | 5       |          | 1     |      |                               |
|                                         | 90%                |               | 5       |          | 1     |      |                               |
|                                         | 100%               |               | 5       |          | 1     |      |                               |
|                                         | 105%               |               | 5       |          | 1     |      |                               |
|                                         | 110%               |               | 3       |          | 1     |      |                               |
| <b>MetCon:</b>                          |                    |               |         |          |       |      |                               |
| Strict DB Shoulder Press (35/25, 30/20) | (35/25, 30/20)     |               | 5       |          | 5     |      | 1 Shoulder Press (DB, Strict) |
| Strict Chin-ups                         |                    |               | 7       |          | 5     |      | Chin-ups (Strict)             |
| HRPU                                    |                    |               | 9       |          | 5     |      | HRPU                          |
| Running man single-unders               |                    |               | 50      |          | 5     |      | 2 Running man single-unders   |
| Day 43                                  |                    |               |         |          |       |      |                               |
| <b>Strength:</b>                        |                    |               |         |          |       |      |                               |
| Bent BB Rows                            |                    |               | 8       |          | 6     |      | 2 Bent Row (BB)               |
| Ring Dips                               |                    |               | 5 to 8  |          | 6     |      | Ring Dips                     |
| <b>MetCon:</b>                          |                    |               |         |          |       |      |                               |
| Run                                     |                    | (20min AMRAP) | 800m    |          | AMRAP |      | Run                           |
| Front Rack KB Squats (32/20, 24/16)     | (205/135, 155/95)  |               | 20      |          | AMRAP |      | Squat (Front Rack KB)         |
| Ring Rows                               |                    |               | 20      |          | AMRAP |      | Ring Rows                     |
| Sit-ups                                 |                    |               | 20      |          | AMRAP |      | Sit-ups                       |
| Day 44                                  |                    |               |         |          |       |      |                               |
| <b>Strength:</b>                        |                    |               |         |          |       |      |                               |
| Bench Press                             |                    |               |         |          |       |      | Bench Press                   |
|                                         | 70%                |               | 5       |          | 1     |      |                               |
|                                         | 80%                |               | 5       |          | 1     |      |                               |
|                                         | 90%                |               | 5       |          | 1     |      |                               |
|                                         | 100%               |               | 5       |          | 1     |      |                               |
|                                         | 110%               |               | 5       |          | 1     |      |                               |
| <b>MetCon:</b>                          |                    |               |         |          |       |      |                               |
| Power Clean (185/125, 135/85)           | (185/125, 135/85)  |               | 10      |          | 4     |      | Clean (Power)                 |
| Bar Facing Burpees                      | Bar Facing         |               | 10      |          | 4     |      | 3 Burpees (Bar Facing)        |
| Auxiliary:                              |                    |               |         |          |       |      |                               |
| DB Curls                                |                    |               | 21-15-9 |          |       |      | 4 Curls (DB)                  |
| DB Lateral Raises                       |                    |               | 21-15-9 |          |       |      | 1 Lateral Raises (DB)         |
| Day 45                                  |                    |               |         |          |       |      |                               |
| <b>Strength:</b>                        |                    |               |         |          |       |      |                               |
| Clean + Pause Jerk                      |                    |               | 2       |          | 6     |      | 5 Clean and Jerk              |
| <b>MetCon:</b>                          |                    |               |         |          |       |      |                               |
| HSPU                                    |                    |               | 21-15-9 |          |       |      | HSPU                          |
| Pull-ups                                |                    |               | 21-15-9 |          |       |      | Pull-ups                      |
| Auxiliary:                              |                    |               |         |          |       |      |                               |
| Row                                     |                    |               | 100m    |          | 10    |      | Row                           |
| Day 46                                  |                    |               |         |          |       |      |                               |
| <b>Strength:</b>                        |                    |               |         |          |       |      |                               |
| Squat @ 82.5%                           | @ 82.5%            |               | 3       |          | 6     |      | Squat                         |
| <b>MetCon:</b>                          |                    |               |         |          |       |      |                               |
| Box Jumps                               |                    |               | 20      |          | 2     |      | Box Jumps                     |
| Run                                     |                    |               | 400m    |          | 2     |      | Run                           |
| No Rest                                 |                    |               |         |          |       |      |                               |
| DL (245/165, 205/145)                   | (245/165, 205/145) |               | 20      |          | 2     |      | Deadlift                      |

|                                           | Weights (lbs)      | Time (min)     | Reps        | Distance         | Sets  | Sums | NOTES                       |
|-------------------------------------------|--------------------|----------------|-------------|------------------|-------|------|-----------------------------|
| Run                                       |                    |                | 400m        |                  | 2     |      | Run                         |
| Day 47                                    |                    |                |             |                  |       |      |                             |
| <b>Strength:</b>                          |                    |                |             |                  |       |      |                             |
| Hang Snatch @ 65-75%                      | @ 65-75%           |                | 2           |                  | 4     |      | Snatch (Hang)               |
| Snatch @ 75-85%                           | @ 75-85%           |                | 1           |                  | 4     |      | Snatch                      |
| <b>MetCon:</b>                            |                    |                |             |                  |       |      |                             |
| DU's                                      |                    |                | 50          |                  | 3     |      | DU's                        |
| KB Swings (32/24, 24/20)                  | (32/24, 24/20)     |                | 35          |                  | 3     |      | KB Swings                   |
| Elevated Push-ups                         | Elevated           |                | 25          |                  | 3     |      | Push-ups                    |
| Day 48                                    |                    |                |             |                  |       |      |                             |
| <b>Strength:</b>                          |                    |                |             |                  |       |      |                             |
| Sumo DL @75%                              | @75%               |                | 5           |                  | 5     |      | Deadlift (Sumo)             |
| <b>MetCon:</b>                            |                    |                |             |                  |       |      |                             |
| Row                                       |                    |                | 1000m       |                  | 1     |      | Row                         |
| S2OH (165/105, 115/75)                    | (165/105, 115/75)  |                | 3,6,9,12,15 | Ascending Ladder |       |      | Shoulder 2 Over-Head (S2OH) |
| T2B                                       |                    |                | 15,12,9,6,3 | Descending x     |       |      | T2B                         |
| Auxiliary:                                |                    |                |             |                  |       |      |                             |
| Back Extensions                           |                    |                | 10          |                  | 4     |      | 5 Back Extensions           |
| Day 49                                    |                    |                |             |                  |       |      |                             |
| <b>Strength:</b>                          |                    |                |             |                  |       |      |                             |
| Front Squat                               |                    |                |             |                  |       |      | Squat (Front)               |
|                                           | 65%                |                | 5           |                  | 1     |      |                             |
|                                           | 75%                |                | 5           |                  | 1     |      |                             |
|                                           | 80%                |                | 5           |                  | 1     |      |                             |
|                                           | 85%                |                | 5           |                  | 1     |      |                             |
|                                           | 90%                |                | 5           |                  | 1     |      |                             |
| <b>MetCon:</b>                            |                    |                |             |                  |       |      |                             |
| Run                                       |                    | (10min. AMRAP) | 200m        |                  | AMRAP |      | Run                         |
| Goblet Hold Walking Lunges (32/24, 24/20) | (32/24, 24/20)     |                | 20paces     |                  | AMRAP |      | Lunges (KB Walking)         |
| Burpees                                   |                    |                | 10          |                  | AMRAP |      | Burpees                     |
| Day 50                                    |                    |                |             |                  |       |      |                             |
| <b>Strength:</b>                          |                    |                |             |                  |       |      |                             |
| OHS Technique Work                        |                    |                |             |                  |       |      | Squat (Overhead)            |
| w/ PVC                                    |                    |                | 10          |                  | 2     |      |                             |
| w/ empty bar                              |                    |                | 10          |                  | 2     |      |                             |
| w/ @ 25%                                  |                    |                | 8           |                  | 2     |      |                             |
| w/ @ 50%                                  |                    |                | 4           |                  | 2     |      |                             |
| W/ @ 65-75%                               |                    |                | 2           |                  | 2     |      |                             |
| <b>MetCon:</b>                            |                    |                |             |                  |       |      |                             |
| Wall Balls                                |                    |                | 10          |                  | 4     |      | Wall Balls                  |
| Ring Rows (w/ feet elevated)              | (w/ feet elevated) |                | 15          |                  | 4     |      | Ring Rows                   |
| Bowtie sit-ups (35/25, 30/20)             | (35/25, 30/20)     |                | 20          |                  | 4     |      | Sit-ups (Bowtie)            |
| Day 51                                    |                    |                |             |                  |       |      |                             |
| <b>Strength:</b>                          |                    |                |             |                  |       |      |                             |
| Bench Press                               |                    |                |             |                  |       |      | Bench Press                 |
|                                           | 60%                |                | 5           |                  | 1     |      |                             |
|                                           | 65%                |                | 5           |                  | 1     |      |                             |
|                                           | 70%                |                | 5           |                  | 1     |      |                             |
|                                           | 75%                |                | 5           |                  | 2     |      |                             |
| <b>MetCon:</b>                            |                    |                |             |                  |       |      |                             |
| For time w/ 15min. Cap                    |                    |                |             |                  |       |      |                             |
| Thrusters(75/45)                          | (75/45)            |                | 10          |                  | 1     |      | Thrusters                   |
|                                           |                    |                | 10          |                  | 1     |      | Burpees                     |
| Burpee Box Jumps                          |                    |                | 10          |                  | 1     |      | Box Jumps                   |
| Thrusters (95/65)                         | (95/65)            |                | 8           |                  | 1     |      | Thrusters                   |
|                                           |                    |                | 8           |                  | 1     |      | Burpees                     |
| Burpee Box Jumps                          |                    |                | 8           |                  | 1     |      | Box Jumps                   |
| Thrusters (115/85)                        | (115/85)           |                | 6           |                  | 1     |      | Thrusters                   |
|                                           |                    |                | 6           |                  | 1     |      | Burpees                     |
| Burpee Box Jumps                          |                    |                | 6           |                  | 1     |      | Box Jumps                   |
| Thrusters (135/105)                       | (135/105)          |                | 4           |                  | 1     |      | Thrusters                   |
|                                           |                    |                | 4           |                  | 1     |      | Burpees                     |
|                                           |                    |                | 4           |                  | 1     |      | Burpees                     |
| Burpee Box Jumps                          |                    |                | 4           |                  | 1     |      | Box Jumps                   |
| Day 52                                    |                    |                |             |                  |       |      |                             |
| <b>Strength:</b>                          |                    |                |             |                  |       |      |                             |
| Snatch + OHS + Hang Snatch                |                    |                | 1           |                  | 6     |      | Snatch                      |
|                                           |                    |                | 1           |                  |       |      | Snatch (Overhead)           |
|                                           |                    |                | 1           |                  |       |      | Snatch (Hang)               |
| <b>MetCon:</b>                            |                    |                |             |                  |       |      |                             |
| Power Snatch (115/75, 85/55)              | (115/75, 85/55)    |                | 9           |                  | 4     |      | Snatch (Power)              |
| T2B                                       |                    |                | 12          |                  | 4     |      | T2B                         |
| Run                                       |                    |                | 300m        |                  | 4     |      | Run                         |
| Auxiliary:                                |                    |                |             |                  |       |      |                             |
| Loaded Back Extensions                    | Loaded             |                | 8           |                  | 4     |      | Back Extensions             |
| Plank Holds                               |                    |                | 45-60sec    |                  | 4     |      | Plank Holds                 |
| Day 53                                    |                    |                |             |                  |       |      |                             |
| <b>Strength:</b>                          |                    |                |             |                  |       |      |                             |
| Establish 5 RM Front Squat                |                    |                | ?           |                  | ?     |      | Squat (Front)               |
| <b>MetCon:</b>                            |                    |                |             |                  |       |      |                             |
| Wall Balls                                |                    |                | 30          |                  | 2     |      | Wall Balls                  |

|                                     | Weights (lbs)      | Time (min)   | Reps           | Distance | Sets        | Sums | NOTES                         |
|-------------------------------------|--------------------|--------------|----------------|----------|-------------|------|-------------------------------|
| KB Swings (32/24, 24/20)            | (32/24, 24/20)     |              | 25             |          | 2           |      | KB Swings                     |
| HRPU                                |                    |              | 20             |          | 2           |      | HRPU                          |
| Strict Chin-ups                     |                    |              | 15             |          | 2           |      | Chin-ups (Strict)             |
| Auxiliary:                          |                    |              |                |          |             |      |                               |
| Row @75%                            | @75%               |              | 1600m          |          | 1           |      | Row                           |
| Day 54                              |                    |              |                |          |             |      |                               |
| <b>Strength:</b>                    |                    |              |                |          |             |      |                               |
| Rope Climbs                         |                    |              | ?              |          | ?           |      | Rope Climbs                   |
| <b>MetCon:</b>                      |                    |              |                |          |             |      |                               |
|                                     |                    |              | 1              |          | 6           |      | Squat (Overhead)              |
|                                     |                    |              | 1              |          | 6           |      | Snatch (Hang)                 |
| Squat Cleans (185/125, 135/85)      | (185/125, 135/85)  |              | 7              |          | 4           |      | Squat Clean                   |
| S2OH                                |                    |              | 9              |          | 4           |      | Shoulder 2 Over-Head (S2OH)   |
| Auxiliary:                          |                    |              |                |          |             |      |                               |
| DB Curls                            |                    |              | 10             |          | 1           |      | Curls (DB)                    |
| Ring Dips                           |                    |              | 10             |          | 1           |      | Ring Dips                     |
| Day 55                              |                    |              |                |          |             |      |                               |
| <b>Strength:</b>                    |                    |              |                |          |             |      |                               |
| DL (start @ 60%)                    | (start @ 60%)      | (8min. EMOM) | 3              |          | 1           |      | Deadlift                      |
|                                     | 65%                |              | 3              |          | 1 (@2min)   |      |                               |
|                                     | 70%                |              | 3              |          | 1 (@4min)   |      |                               |
|                                     | 75%                |              | 3              |          | 1 (@6min)   |      |                               |
| <b>MetCon:</b>                      |                    |              |                |          |             |      |                               |
| Pull-ups                            |                    |              | 25             |          | 1           |      | Pull-ups                      |
| Burpees                             |                    |              | 10             |          | 1           |      | Burpees                       |
| Run                                 |                    |              | 400m           |          | 1           |      | Run                           |
| Pull-ups                            |                    |              | 18             |          | 1           |      | Pull-ups                      |
| Burpees                             |                    |              | 10             |          | 1           |      | Burpees                       |
| Run                                 |                    |              | 200m           |          | 1           |      | Run                           |
| Pull-ups                            |                    |              | 11             |          | 1           |      | Pull-ups                      |
| Burpees                             |                    |              | 10             |          | 1           |      | Burpees                       |
| Run                                 |                    |              | 100m           |          | 1           |      | Run                           |
| Day 56                              |                    |              |                |          |             |      |                               |
| <b>Strength:</b>                    |                    |              |                |          |             |      |                               |
| Squat @80%                          | @80%               |              | 2              |          | 6           |      | Squat                         |
| <b>MetCon:</b>                      |                    |              |                |          |             |      |                               |
| DU's                                |                    |              | 100            |          | 2           |      | DU's                          |
| SA KB Swings (32/20, 24/16)         | (32/20, 24/16)     |              | 75             |          | 2           |      | KB Swings (single)            |
| Sit-ups                             |                    |              | 50             |          | 2           |      | Sit-ups                       |
| Power Cleans (185/125, 135/85)      | (185/125, 135/85)  |              | 25             |          | 2           |      | Clean (Power)                 |
| Day 57                              |                    |              |                |          |             |      |                               |
| <b>Strength:</b>                    |                    |              |                |          |             |      |                               |
| KB Front Rack Walking Lunges        | KB                 |              | 16paces        |          | 3           |      | Lunges (Front Rack Walking)   |
| BB Front Rack Walking Lunges        | BB                 |              | 10paces        |          | 3           |      | 3 Lunges (Front Rack Walking) |
| <b>MetCon:</b>                      |                    |              |                |          |             |      |                               |
| Run                                 |                    |              | 800m           |          | 1           |      | Run                           |
| Strict Chin-ups                     |                    |              | 5              |          | 5           |      | Chin-ups (Strict)             |
| Ring Push-ups                       |                    |              | 10             |          | 5           |      | Push-ups (Ring)               |
| Run                                 |                    |              | 800m           |          | 1           |      | Run                           |
| Day 58                              |                    |              |                |          |             |      |                               |
| <b>Strength:</b>                    |                    |              |                |          |             |      |                               |
| Establish a 5RM Bench Press         |                    |              |                |          |             |      | Bench Press                   |
| <b>MetCon:</b>                      |                    |              |                |          |             |      |                               |
| KB Swings (32/24, 24/20)            | (32/24, 24/20)     |              | 50-40-30-20-10 |          |             |      | KB Swings                     |
| DU's                                |                    |              | 50-40-30-20-10 |          |             |      | DU's                          |
| Every Minute drop and do 5 push-ups |                    |              | every minute   |          |             |      | Push-ups                      |
| Auxiliary:                          |                    |              |                |          |             |      |                               |
| TGU                                 |                    |              | 2each          |          | 5           |      | 0 TGU (KB)                    |
| Day 59                              |                    |              |                |          |             |      |                               |
| <b>Strength:</b>                    |                    |              |                |          |             |      |                               |
| Power Cleans (205/135, 155/105)     | (205/135, 155/105) | (7min. EMOM) | 5              |          | Odd Minute  |      | Clean (Power)                 |
| Bar Facing Burpees                  | Bar Facing         |              | 5              |          | Even Minute |      | Burpees (Bar Facing)          |
| <b>MetCon:</b>                      |                    |              |                |          |             |      |                               |
| DL (225/155, 185/125)               | (225/155, 185/125) |              | 21-15-9        |          |             |      | Deadlift                      |
| Pull-ups                            |                    |              | 21-15-9        |          |             |      | Pull-ups                      |
| Day 60                              |                    |              |                |          |             |      |                               |
| <b>Strength:</b>                    |                    |              |                |          |             |      |                               |
| Squat @82.5%                        | @82.5%             |              | 2              |          | 6           |      | Squat                         |
| <b>MetCon:</b>                      |                    |              |                |          |             |      |                               |
| S2OH (135/85, 95/65)                | (135/85, 95/65)    |              | 15             |          | 2           |      | Shoulder 2 Over-Head (S2OH)   |
| OH Walking Lunge                    |                    |              | 10paces        |          | 2           |      | Lunges (OH Walking)           |
| No rest                             |                    |              |                |          |             |      |                               |
| S2OH (155/105, 115/85)              | (155/105, 115/85)  |              | 10             |          | 2           |      | Shoulder 2 Over-Head (S2OH)   |
| Front Rack Waling lunges            |                    |              | 10paces        |          | 2           |      | Lunges (Front Rack Walking)   |
| Day 61                              |                    |              |                |          |             |      |                               |
| <b>Strength:</b>                    |                    |              |                |          |             |      |                               |



|                                    | Weights (lbs)          | Time (min)       | Reps         | Distance | Sets            | Sums | NOTES                       |
|------------------------------------|------------------------|------------------|--------------|----------|-----------------|------|-----------------------------|
| Snatch @ 70-85%                    | @70-85%                |                  | 2            |          | 6               |      | Snatch                      |
| <b>MetCon:</b>                     |                        | For Time         |              |          |                 |      |                             |
| Wall Balls                         | (30/20, 20/14)         |                  | 40           |          | 1               |      | Wall Balls                  |
| Run                                |                        |                  | 400m         |          | 1               |      | Run                         |
| HRPU                               |                        |                  | 30           |          | 1               |      | HRPU                        |
| Run                                |                        |                  | 300m         |          |                 |      | Run                         |
| HSPU                               |                        |                  | 20           |          |                 |      | HSPU                        |
| Run                                |                        |                  | 200m         |          |                 | 1    | Run                         |
| Pistols (or heavy loaded step ups) |                        |                  | 10each       |          |                 |      | Squat (Pistol)              |
| Run                                |                        |                  | 100m         |          |                 |      | Run                         |
| Auxiliary:                         |                        |                  |              |          |                 |      |                             |
| DB Curls                           |                        |                  | 12           |          | 4               |      | Curls (DB)                  |
| Ring Dips                          |                        |                  | 12           |          | 4               |      | Ring Dips                   |
| Day 62                             |                        |                  |              |          |                 |      |                             |
| <b>Strength:</b>                   |                        |                  |              |          |                 |      |                             |
| DL @60%                            | @60%                   |                  | 5            |          | 2               |      | Deadlift                    |
|                                    | 70%                    |                  | 4            |          | 2               |      |                             |
|                                    | 75%                    |                  | 3            |          | 2               |      |                             |
| <b>MetCon:</b>                     |                        |                  |              |          |                 |      |                             |
| Row                                |                        |                  | 350m         |          | 3               |      | Row                         |
| Sit-ups                            |                        |                  | 25           |          | 3               |      | Sit-ups                     |
| KB Snatch (32/20, 24/16)           | (32/20, 24/16)         |                  | 20           |          | 3               |      | Snatch (KB)                 |
| Goblet Squat                       |                        |                  | 15           |          | 3               |      | Squat (KB Goblet)           |
| Auxiliary:                         |                        |                  |              |          |                 |      |                             |
| Farmer Walks                       |                        |                  | 100m         |          | 4               |      | 2 Farmer Walks              |
| Day 63                             |                        |                  |              |          |                 |      |                             |
| <b>Strength:</b>                   |                        |                  |              |          |                 |      |                             |
| Jerks @ 70-75%                     | @ 70-75%               |                  | 3            |          | 2               |      | Jerk                        |
| 75-80%                             | 75-80%                 |                  | 2            |          | 2               |      |                             |
| 95-90%                             | 95-90%                 |                  | 1            |          | 3               |      |                             |
| <b>MetCon:</b>                     |                        |                  |              |          |                 |      |                             |
| Muscle Ups                         |                        |                  | 3,6,9        |          |                 |      | Muscle Ups                  |
| Power Cleans (205/140, 185/125)    | (205/140, 185/125)     |                  | 3,6,9        |          |                 |      | Clean (Power)               |
| No Rest                            |                        |                  |              |          |                 |      |                             |
| Strict Chin-ups                    |                        |                  |              |          | 6,9,12          |      | Chin-ups (Strict)           |
| DU's                               |                        |                  | 50           |          | 6,9,12          |      | DU's                        |
| No Rest                            |                        |                  |              |          |                 |      |                             |
| Burpees                            |                        |                  |              |          | 9,12,15         |      | Burpees                     |
| Run                                |                        |                  | 400m         |          | 9,12,15         |      | Run                         |
| Auxiliary:                         |                        |                  |              |          |                 |      |                             |
| Prowler Push                       |                        |                  | 100m         |          | 4               |      | 2 Prowler Push              |
| Day 64                             |                        |                  |              |          |                 |      |                             |
| <b>Strength:</b>                   |                        | (10min. EMOM)    |              |          |                 |      |                             |
| Push-ups                           |                        |                  | 10           |          | Odd Minute (5)  |      | Push-ups                    |
| Bent BB Rows                       |                        |                  | 10           |          | Even Minute (5) |      | Bent Row (BB)               |
| <b>MetCon:</b>                     |                        | (10min. AMRAP)   |              |          |                 |      |                             |
| DB Step-ups (35/25, 30/20)         | (35/25, 30/20)         |                  | 10           |          | AMRAP           |      | Step-ups (DB)               |
| T2B                                |                        |                  | 10           |          | AMRAP           |      | T2B                         |
| Ring Dips                          |                        |                  | 10           |          | AMRAP           |      | Ring Dips                   |
| Day 65                             |                        |                  |              |          |                 |      |                             |
| <b>Strength:</b>                   |                        |                  |              |          |                 |      |                             |
| Establish 1RM Thruster             |                        |                  |              |          |                 |      | Thrusters                   |
| <b>MetCon:</b>                     |                        |                  |              |          |                 |      |                             |
| Hang Power Clean (135/85, 95/65)   | (135/85, 95/65)        |                  | 9            |          | 3               |      | Clean (Hang Power)          |
| Thrusters (135/85, 95/65)          | (135/85, 95/65)        |                  | 15           |          | 3               |      | Thrusters                   |
| Auxiliary:                         |                        |                  |              |          |                 |      |                             |
| Row                                |                        |                  | 250m         |          | 8               |      | Row                         |
| Day 66                             |                        |                  |              |          |                 |      |                             |
| <b>Strength:</b>                   |                        |                  |              |          |                 |      |                             |
| 20min to establish 1RM Back Squat  | 20min to establish 1RM |                  |              |          |                 |      | Squat                       |
| <b>MetCon:</b>                     |                        | (20min time cap) |              |          |                 |      |                             |
| DU's                               |                        |                  | 100          |          | 1               |      | DU's                        |
| KB Swings                          |                        |                  | 80           |          | 1               |      | KB Swings                   |
| Feet elevated push-ups             | Feet elevated          |                  | 60           |          | 1               |      | Push-ups                    |
| pull-ups                           |                        |                  | 40           |          | 1               |      | Pull-ups                    |
| Single arm OH KB walking Lunges    |                        |                  | 20paces      |          | 1               |      | Lunges (OH Walking, Single) |
| Running man singles                |                        |                  | 100          |          | 1               |      | Running man single-unders   |
| Day 67                             |                        |                  |              |          |                 |      |                             |
| <b>Strength:</b>                   |                        |                  |              |          |                 |      |                             |
| Snatch Pulls + Snatch              |                        |                  | 2            |          | 8               |      | Snatch Pull                 |
|                                    |                        |                  | 1            |          |                 |      | Snatch                      |
| <b>MetCon:</b>                     |                        |                  |              |          |                 |      |                             |
| 8min. Ladder                       | 8min. Ladder           |                  |              |          |                 |      |                             |
| Front Squat (155/100, 115/85)      | (155/100, 115/85)      |                  | 3,6,9,12,... |          | 8min            |      | Squat (Front)               |
| Box Jumps                          |                        |                  | 3,6,9,12...  |          | 8min            |      | Box Jumps                   |
| HSPU                               |                        |                  |              |          |                 |      | HSPU                        |
| Auxiliary:                         |                        |                  |              |          |                 |      |                             |
| Floor Sweeps                       |                        |                  | 20           |          | 3               |      | Floor Sweeps                |
| Loaded Back Extensions             | Loaded                 |                  | 10           |          | 3               |      | Back Extensions             |

|                                             | Weights (lbs)            | Time (min)        | Reps                | Distance | Sets  | Sums | NOTES                        |
|---------------------------------------------|--------------------------|-------------------|---------------------|----------|-------|------|------------------------------|
| Day 68                                      |                          |                   |                     |          |       |      |                              |
| No W.O.D. Holiday                           |                          |                   |                     |          |       |      |                              |
| Day 69                                      |                          |                   |                     |          |       |      |                              |
| <b>Strength:</b>                            |                          |                   |                     |          |       |      |                              |
| Bench Press @75-100% of BW                  | @75-100% of BW           |                   | 10, 8, 6, 4, 2      |          | 5     |      | Bench Press                  |
| Bent Double KB or DB Rows                   |                          |                   | 8                   |          | 4     | 1    | Bent Row (KB/DB)             |
| <b>MetCon:</b>                              |                          |                   |                     |          |       |      |                              |
| Wall Balls                                  |                          |                   | 25                  |          | 3     |      | Wall Balls                   |
| Sit-ups                                     |                          |                   | 20                  |          | 3     |      | Sit-ups                      |
| Burpees                                     |                          |                   | 15                  |          | 3     |      | Burpees                      |
| Auxiliary:                                  |                          |                   |                     |          |       |      |                              |
| Sledge Strikes                              |                          |                   | 20                  |          | 3     | 4    | Sledge Strikes               |
| KB Cross Walks (switch hands every 50m)     | (switch hands every 50m) |                   | 100m                |          | 4     |      | Cross Walks (KB)             |
| Day 70                                      |                          |                   |                     |          |       |      |                              |
| <b>Strength:</b>                            |                          |                   |                     |          |       |      |                              |
| Power Clean + Front Squat + Jerk            |                          |                   | 1                   |          | 5     |      | Clean (Power) and Jerk       |
| <b>MetCon:</b>                              |                          |                   |                     |          |       |      |                              |
| HSPU                                        |                          |                   | 7                   |          | 7     |      | HSPU                         |
| Thrusters (135/95)                          | (135/95)                 |                   | 7                   |          | 7     |      | Thrusters                    |
| HSPU                                        |                          |                   | 7                   |          | 7     |      | HSPU                         |
| T2B                                         |                          |                   | 7                   |          | 7     |      | T2B                          |
| DL(245/175)                                 | (245/175)                |                   | 7                   |          | 7     |      | Deadlift                     |
| Burpees                                     |                          |                   | 7                   |          | 7     |      | Burpees                      |
| KB Swing (32/20)                            | (32/20)                  |                   | 7                   |          | 7     |      | KB Swings                    |
| Pull-ups                                    |                          |                   | 7                   |          | 7     |      | Pull-ups                     |
| Day 71                                      |                          |                   |                     |          |       |      |                              |
| <b>Strength:</b>                            |                          |                   |                     |          |       |      |                              |
| KB Front Rack Elevated Split Squats         |                          |                   | 5each               |          | 5     |      | Squat (Split, Front Rack KB) |
| <b>MetCon:</b>                              |                          |                   |                     |          |       |      |                              |
| Run                                         |                          |                   | 300m                |          | 4     |      | Run                          |
| Ball Slams                                  |                          |                   | 15                  |          | 4     |      | Ball Slams                   |
| Farmer Carry (32/20, 24/16)                 | (32/20, 24/16)           |                   | 100m                |          | 4     | 1    | Farmer Carry                 |
| Day 72                                      |                          |                   |                     |          |       |      |                              |
| <b>Strength:</b>                            |                          |                   |                     |          |       |      |                              |
| Snatch                                      |                          |                   | 2                   |          | 6     |      | Snatch                       |
| <b>MetCon:</b>                              |                          |                   |                     |          |       |      |                              |
|                                             |                          |                   | 2                   |          | 5     |      | Squat (Front)                |
| Power Cleans (205/135, 155/95)              | (205/135, 155/95)        |                   | 6                   |          | 5     |      | Clean (Power)                |
| Box Jumps                                   |                          |                   | 9                   |          | 5     |      | Box Jumps                    |
| HRPU                                        |                          |                   | 12                  |          | 5     |      | HRPU                         |
| Auxiliary:                                  |                          |                   |                     |          |       |      |                              |
| Row (Max Effort)                            | Max Effort               |                   | 30sec On/30Ssec OFF |          | 6     |      | Row                          |
| Day 73                                      |                          |                   |                     |          |       |      |                              |
| <b>Strength:</b>                            |                          |                   |                     |          |       |      |                              |
| Squats @80%                                 | @80%                     |                   | 2                   |          | 6     |      | Squat                        |
| <b>MetCon:</b>                              |                          |                   |                     |          |       |      |                              |
| DL (135/85, 95/65)                          | (135/85, 95/65)          |                   | 15                  |          | 1     |      | Deadlift                     |
| S2OH                                        |                          |                   | 15                  |          | 1     |      | Shoulder 2 Over-Head (S2OH)  |
| DU's                                        |                          |                   | 50                  |          | 1     |      | DU's                         |
| Rest                                        |                          |                   | 1min                |          | 1     |      |                              |
| DL (135/85, 95/65)                          | (135/85, 95/65)          |                   | 12                  |          | 2     |      | Deadlift                     |
| S2OH                                        |                          |                   | 12                  |          | 2     |      | Shoulder 2 Over-Head (S2OH)  |
| DU's                                        |                          |                   | 35                  |          | 2     |      | DU's                         |
| Rest                                        |                          |                   | 2min                |          | 1     |      |                              |
| DL (135/85, 95/65)                          | (135/85, 95/65)          |                   | 10                  |          | 3     |      | Deadlift                     |
| S2OH                                        |                          |                   | 10                  |          | 3     |      | Shoulder 2 Over-Head (S2OH)  |
| DU's                                        |                          |                   | 20                  |          | 3     |      | DU's                         |
| Day 74                                      |                          |                   |                     |          |       |      |                              |
| <b>Strength:</b>                            |                          |                   |                     |          |       |      |                              |
| Clean                                       |                          |                   | 2                   |          | 5     |      | Clean                        |
| <b>MetCon:</b>                              |                          |                   |                     |          |       |      |                              |
|                                             |                          | (15min. Time Cap) |                     |          |       |      |                              |
| Pull-ups                                    |                          |                   | 21-15-9             |          | 3     |      | Pull-ups                     |
| SA KB Swing (32/20, 24/16) reps are per arm | (32/20, 24/16)           |                   | 21-15-9             |          | 3     |      | KB Swings (single)           |
| Row                                         |                          |                   | 1000m               |          |       |      | Row                          |
| Day 75                                      |                          |                   |                     |          |       |      |                              |
| <b>Strength:</b>                            |                          |                   |                     |          |       |      |                              |
| DL                                          |                          |                   |                     |          |       |      | Deadlift                     |
|                                             | 60%                      |                   | 5                   |          | 1     |      |                              |
|                                             | 70%                      |                   | 4                   |          | 1     |      |                              |
|                                             | 80%                      |                   | 3                   |          | 1     |      |                              |
|                                             | 85%                      |                   | 2                   |          | 3     |      |                              |
| <b>MetCon:</b>                              |                          |                   |                     |          |       |      |                              |
|                                             |                          | (20min. AMRAP)    |                     |          |       |      |                              |
| Wall Balls                                  |                          |                   | 50                  |          | AMRAP |      | Wall Balls                   |
| Run                                         |                          |                   | 400m                |          | AMRAP |      | Run                          |
| Sit-ups w/WB                                |                          |                   | 40                  |          | AMRAP | 1    | Sit-ups (WB)                 |
| Run                                         |                          |                   | 300m                |          | AMRAP |      | Run                          |
| Burpees                                     |                          |                   | 30                  |          | AMRAP |      | Burpees                      |

|                                                           | Weights (lbs)                 | Time (min)                          | Reps    | Distance | Sets  | Sums | NOTES                       |
|-----------------------------------------------------------|-------------------------------|-------------------------------------|---------|----------|-------|------|-----------------------------|
| Run Thrusters (135/85, 95/65)                             | (135/85, 95/65)               |                                     | 200m    |          | AMRAP |      | Run                         |
| Run                                                       |                               |                                     | 100m    |          | AMRAP |      | Run                         |
| Run                                                       |                               |                                     |         |          | AMRAP |      | Run                         |
| Day 76                                                    |                               |                                     |         |          |       |      |                             |
| <b>Strength:</b>                                          |                               |                                     |         |          |       |      |                             |
| Renegade Rows                                             |                               |                                     | 10      |          | 4     |      | Row (Renegade)              |
| <b>MetCon:</b>                                            |                               |                                     |         |          |       |      |                             |
| Strict HSPU                                               |                               |                                     | 15-12-9 |          | 3     |      | HSPU (Strict)               |
| KB/DB front Rack lunges (32/20, 24/16) per leg            | (32/20, 24/16) per leg        |                                     | 15-12-9 |          | 3     |      | 1 Lunges (KB/DB Front Rack) |
| T2B                                                       |                               |                                     | 15-12-9 |          | 3     |      | T2B                         |
| Auxiliary:                                                |                               |                                     |         |          |       |      |                             |
| DB Curls                                                  |                               |                                     | 10      |          | 4     |      | Curls (DB)                  |
| Band Tricep Extensions                                    |                               |                                     | 20      |          | 4     |      | Tricep Extensions (Band)    |
| Day 77                                                    |                               |                                     |         |          |       |      |                             |
| <b>Strength:</b>                                          |                               |                                     |         |          |       |      |                             |
| Front Squat Starting at 60%                               | Starting at 60%               | 10min. EMOM                         | ?       |          | 10    |      | Squat (Front)               |
| (increase weight every round)                             | (increase weight every round) |                                     |         |          |       |      |                             |
| <b>MetCon:</b>                                            |                               |                                     |         |          |       |      |                             |
| Power Cleans (185/125, 135/95)                            | (185/125, 135/95)             |                                     | AMRAP   |          | 3     |      | Clean (Power)               |
| Front Squats                                              |                               |                                     | AMRAP   |          | 3     |      | Squat (Front)               |
| Strict Chin-ups                                           |                               |                                     | AMRAP   |          | 3     |      | Chin-ups (Strict)           |
| KB Swing (32/24, 24/20)                                   | (32/24, 24/20)                |                                     | AMRAP   |          | 3     |      | KB Swings                   |
| Row                                                       |                               |                                     | AMRAP   |          | 3     |      | Row                         |
| Day 78                                                    |                               |                                     |         |          |       |      |                             |
| <b>Strength:</b>                                          |                               |                                     |         |          |       |      |                             |
| Bench Press                                               | @70%                          |                                     | 8       |          | 1     |      | Bench Press                 |
|                                                           | @75%                          |                                     | 8       |          | 1     |      |                             |
|                                                           | @80%                          |                                     | 4       |          | 3     |      |                             |
| <b>MetCon:</b>                                            |                               |                                     |         |          |       |      |                             |
| Burpee Box Jumps                                          | (30/24, 24/20)                |                                     | 5       |          | 4     |      | Burpee Box Jumps            |
| DB Alternating Press                                      |                               |                                     | 10each  |          | 4     |      | Press (DB)                  |
| Ring Rows                                                 |                               |                                     | 15      |          | 4     |      | Ring Rows                   |
| Auxiliary:                                                |                               |                                     |         |          |       |      |                             |
| SLRDL                                                     |                               |                                     | 8each   |          | 4     |      | RDL (single leg)            |
| Day 79                                                    |                               |                                     |         |          |       |      |                             |
| <b>Strength:</b>                                          |                               |                                     |         |          |       |      |                             |
| Clean and Jerk @70-85%                                    | @70-85%                       |                                     | 2       |          | 3     |      | Clean and Jerk              |
| <b>MetCon:</b>                                            |                               |                                     |         |          |       |      |                             |
| Row                                                       |                               | (for time)                          | 500m    |          | 1     |      | Row                         |
| Air Squats                                                |                               |                                     | 40      |          | 1     |      | Squat (Air)                 |
| Sit-ups                                                   |                               |                                     | 30      |          | 1     |      | Sit-ups                     |
| Push-ups                                                  |                               |                                     | 20      |          | 1     |      | Push-ups                    |
| Pull-ups                                                  |                               |                                     | 10      |          | 1     |      | Pull-ups                    |
| Auxiliary:                                                |                               |                                     |         |          |       |      |                             |
| DU's                                                      |                               |                                     | 3       |          | max   |      | DU's                        |
| Day 80                                                    |                               |                                     |         |          |       |      |                             |
| <b>Strength:</b>                                          |                               |                                     |         |          |       |      |                             |
| Squat @80%                                                | @80%                          |                                     | 4       |          | 6     |      | Squat                       |
| <b>MetCon:</b>                                            |                               |                                     |         |          |       |      |                             |
| C&J (135/95)                                              | (135/95)                      | (13.4 - 7min. Ladder 3,6,9,12,15..) |         |          |       |      | Clean and Jerk              |
| T2B                                                       |                               |                                     |         |          |       |      | T2B                         |
| Auxiliary:                                                |                               |                                     |         |          |       |      |                             |
| Loaded Back Extensions                                    | Loaded                        |                                     | 8       |          | 4     |      | Back Extensions             |
| Day 81                                                    |                               |                                     |         |          |       |      |                             |
| <b>Strength:</b>                                          |                               |                                     |         |          |       |      |                             |
| Hang Power Snatch + Hang Snatch + Snatch (work up to 80%) |                               |                                     | 1       |          | 6     |      | Snatch (Hang Power)         |
|                                                           |                               |                                     | 1       |          | 6     |      | Snatch (Hang)               |
|                                                           |                               |                                     | 1       |          | 6     |      | Snatch                      |
| <b>MetCon:</b>                                            |                               |                                     |         |          |       |      |                             |
| Front Squat (185/125, 135/105)                            | (185/125, 135/105)            | 25min cap                           | 6       |          | 5     |      | Squat (Front)               |
| Burpees                                                   |                               |                                     | 12      |          | 5     |      | Burpees                     |
| KB Swings (32/24, 24/20)                                  | (32/24, 24/20)                |                                     | 18      |          | 5     |      | KB Swings                   |
| Run                                                       |                               |                                     | 400m    |          | 5     |      | Run                         |
| Day 82                                                    |                               |                                     |         |          |       |      |                             |
| <b>Strength:</b>                                          |                               |                                     |         |          |       |      |                             |
| Deadlifts                                                 | @50%                          |                                     | 8       |          |       |      | Deadlift                    |
|                                                           | @55-60%                       |                                     | 6       |          |       |      |                             |
|                                                           | @65-70%                       |                                     | 4       |          |       |      |                             |
|                                                           | @75-80%                       |                                     | 2       |          |       |      |                             |
|                                                           | @85-90%                       |                                     | 2       |          |       |      |                             |
| <b>MetCon:</b>                                            |                               |                                     |         |          |       |      |                             |
| DL                                                        | (275/200, 225/186)            |                                     | 7       |          | 3     |      | Deadlift                    |
| Strict Chin-ups                                           |                               |                                     | 7       |          | 3     |      | Chin-ups (Strict)           |
| Deficit HSPU                                              | one plate per side            |                                     | 7       |          | 3     |      | HSPU (Deficit)              |
| Auxiliary:                                                |                               |                                     |         |          |       |      |                             |
| Floor Sweeps                                              |                               |                                     | 20      |          | 4     |      | Floor Sweeps                |

|                                                       | Weights (lbs)                             | Time (min)          | Reps         | Distance | Sets | Sums | NOTES                          |
|-------------------------------------------------------|-------------------------------------------|---------------------|--------------|----------|------|------|--------------------------------|
| Day 83                                                |                                           |                     |              |          |      |      |                                |
| <b>Strength:</b>                                      |                                           |                     |              |          |      |      |                                |
| Bench Press starts @70% (increasing by 5% each round) | starts @70% (increasing by 5% each round) |                     | 5            |          | 5    |      | Bench Press                    |
| Standing One Arm KB/DB row                            |                                           |                     | 5each        |          | 5    |      | 1 Standing Row (KB/DB, single) |
| <b>MetCon:</b>                                        |                                           |                     |              |          |      |      |                                |
| DU's                                                  |                                           |                     | 100          |          | 1    |      | DU's                           |
| Push-ups                                              |                                           |                     | 20           |          | 4    |      | Push-ups                       |
| OH Plate Walking Lunges (45/35)                       | (45/35)                                   |                     | 20paces      |          | 4    |      | Lunges (OH Walking)            |
| Ring Rows                                             |                                           |                     | 20           |          | 4    |      | Ring Rows                      |
| DU's                                                  |                                           |                     | 100          |          | 1    |      | DU's                           |
| Auxiliary:                                            |                                           |                     |              |          |      |      |                                |
| Heavy BB Curls                                        |                                           |                     | 10           |          | 4    |      | Curls (BB)                     |
| Ring Tricep Extensions                                |                                           |                     | 10           |          | 4    |      | Tricep Extensions (Ring)       |
| Day 84                                                |                                           |                     |              |          |      |      |                                |
| <b>Strength:</b>                                      |                                           |                     |              |          |      |      |                                |
| Squat @80%                                            | @80%                                      |                     | 2            |          | 6    |      | Squat                          |
| <b>MetCon:</b>                                        |                                           |                     |              |          |      |      |                                |
| Row                                                   |                                           |                     | 3000m        |          | 1    |      | Row                            |
| DB Thrusters (30/20, 20/14)                           | (30/20, 20/14)                            |                     | 150          |          | 1    |      | 2 Thrusters (DB)               |
| Bowtie sit-ups (35/20, 25/20)                         | (35/20, 25/20)                            |                     | 120          |          | 1    |      | Sit-ups (Bowtie)               |
| Pull-ups                                              |                                           |                     | 90           |          | 1    |      | Pull-ups                       |
| Auxiliary:                                            |                                           |                     |              |          |      |      |                                |
| Loaded Back Extensions                                | Loaded                                    |                     | 10           |          | 4    |      | Back Extensions                |
| Day 85                                                |                                           |                     |              |          |      |      |                                |
| Prowler Push                                          |                                           |                     | 100m         |          | 10   |      | Prowler Push                   |
| KB Farmer Walks/Rack Hold Walks                       | AHAP                                      |                     | 100m         |          | 10   |      | 2 Farmer Walks (KB)            |
| Overhead Sledge Strikes                               |                                           |                     | 10each       |          | 10   |      | Overhead Sledge Strikes        |
| Run                                                   |                                           |                     | 300m         |          | 10   |      | Run                            |
| Auxiliary:                                            |                                           |                     |              |          |      |      |                                |
| Row                                                   |                                           |                     | 2000m        |          | 1    |      | Row                            |
| Day 86                                                |                                           |                     |              |          |      |      |                                |
| <b>Strength:</b>                                      |                                           |                     |              |          |      |      |                                |
| Snatch                                                |                                           |                     | 1            |          | 5    |      | Snatch                         |
| C & J                                                 |                                           |                     | 1            |          | 5    |      | Clean and Jerk                 |
| <b>MetCon:</b>                                        |                                           |                     |              |          |      |      |                                |
| Power Clean (185/125, 135/95)                         | (185/125, 135/95)                         |                     | 21,15,9      |          | 3    |      | Clean (Power)                  |
| Bar Facing Burpees                                    |                                           |                     | 21,15,9      |          | 3    |      | Burpees (Bar Facing)           |
| Auxiliary:                                            |                                           |                     |              |          |      |      |                                |
| Anti-rotational press                                 |                                           |                     | 8each        |          | 4    |      | Press (Anti-rotational)        |
| Day 87                                                |                                           |                     |              |          |      |      |                                |
| <b>Strength:</b>                                      |                                           |                     |              |          |      |      |                                |
| Squats @80%                                           | @80%                                      |                     | 5            |          | 6    |      | Squat                          |
| <b>MetCon: 18min Cap</b>                              |                                           |                     |              |          |      |      |                                |
| HSPU                                                  |                                           | 18min Cap           | 4            |          | 3    |      | HSPU                           |
| Run                                                   |                                           |                     | 100m         |          | 3    |      | Run                            |
| Pull-ups                                              |                                           |                     | 8            |          | 3    |      | Pull-ups                       |
| Run                                                   |                                           |                     | 100m         |          | 3    |      | Run                            |
| HRPU                                                  |                                           |                     | 12           |          | 3    |      | HRPU                           |
| Run                                                   |                                           |                     | 100m         |          | 3    |      | Run                            |
| Air Squats                                            |                                           |                     | 16           |          | 3    |      | Squat (Air)                    |
| Run                                                   |                                           |                     | 100m         |          | 3    |      | Run                            |
| Sit-ups                                               |                                           |                     | 20           |          | 3    |      | Sit-ups                        |
| Run                                                   |                                           |                     | 100m         |          | 3    |      | Run                            |
| Day 88                                                |                                           |                     |              |          |      |      |                                |
| <b>Strength:</b>                                      |                                           |                     |              |          |      |      |                                |
| Hang Clean + Pause Jerk                               |                                           |                     | 2            |          | 6    |      | Clean (Hang)                   |
|                                                       |                                           |                     | 2            |          | 6    |      | Jerk (Pause)                   |
| <b>MetCon:</b>                                        |                                           |                     |              |          |      |      |                                |
| Thrusters (155/95, 115/75)                            | (155/95, 115/75)                          |                     | 10           |          | 3    |      | Thrusters                      |
| KB Swings (32/24, 24/20)                              | (32/24, 24/20)                            |                     | 25           |          | 3    |      | KB Swings                      |
| Auxiliary:                                            |                                           |                     |              |          |      |      |                                |
| Row                                                   |                                           |                     | 250m         |          | 4    |      | Row                            |
| Day 89                                                |                                           |                     |              |          |      |      |                                |
| <b>Strength:</b>                                      |                                           |                     |              |          |      |      |                                |
| DL @80%                                               | @80%                                      |                     | 3            |          | 5    |      | Deadlift                       |
| <b>MetCon:</b>                                        |                                           |                     |              |          |      |      |                                |
| Box Jumps (30/24, 24/20)                              | (30/24, 24/20)                            |                     | 10           |          | 4    |      | Box Jumps                      |
| T2B                                                   |                                           |                     | 12           |          | 4    |      | T2B                            |
| Row                                                   |                                           |                     | 15 Calories? |          | 4    |      | Row                            |
| Day 90                                                |                                           |                     |              |          |      |      |                                |
| <b>Strength:</b>                                      |                                           |                     |              |          |      |      |                                |
| Bench Press (10min EMOM)                              | (10min EMOM)<br>10-1 @ 75-100%<br>of BW   |                     |              |          |      |      | Bench Press                    |
| <b>MetCon: 90 second intervals</b>                    |                                           |                     |              |          |      |      |                                |
| Wall Balls (20/14)                                    | (20/14)                                   | 90 second intervals | 15           |          | 4    |      | Wall Balls                     |

|                                                             | Weights (lbs)      | Time (min)  | Reps    | Distance | Sets | Sums | NOTES                                  |
|-------------------------------------------------------------|--------------------|-------------|---------|----------|------|------|----------------------------------------|
| Strict Chin-ups                                             |                    |             | 7       |          | 4    |      | Chin-ups (Strict)                      |
| DU's                                                        |                    |             | AMRAP   |          | 4    |      | DU's                                   |
| Auxiliary:                                                  |                    |             |         |          |      |      |                                        |
| Bar Roll-outs                                               |                    |             | 10      |          | 4    |      | Bar Roll-outs                          |
| Floor Sweeps                                                |                    |             | 16      |          | 4    |      | Floor Sweeps                           |
| Day 91                                                      |                    |             |         |          |      |      |                                        |
| <b>Strength:</b>                                            |                    |             |         |          |      |      |                                        |
| OHS                                                         |                    |             | 3       |          | 5    |      | Squat (Overhead)                       |
| <b>MetCon:</b>                                              |                    |             |         |          |      |      |                                        |
| Rope Climbs                                                 |                    |             | 10      |          | 2    |      | Rope Climbs                            |
| KB Walking lunge in Single arm Rack Hold (3/(32/20, 24/16)) |                    |             | 50      |          | 2    |      | Lunges (KB Walking, Single, Rack Hold) |
| KB Jerks                                                    |                    |             | 50      |          | 2    | 1    | Jerk (KB)                              |
| Run                                                         |                    |             | 10      |          | 2    |      | Run                                    |
| Auxiliary:                                                  |                    |             |         |          |      |      |                                        |
| Sledge Strikes                                              |                    |             | 20      |          | 4    |      | Sledge Strikes                         |
| Med Ball Russian Twist                                      | Med Balls          |             | 20      |          | 4    |      | 3 Russian Twists                       |
| Day 92                                                      |                    |             |         |          |      |      |                                        |
| <b>Strength:</b>                                            |                    |             |         |          |      |      |                                        |
| Strict Press + Push Press + Split Jerk                      |                    |             | 1       |          | 6    |      | 1 Press (Strict)                       |
|                                                             |                    |             | 1       |          | 6    |      | Push Press                             |
|                                                             |                    |             | 1       |          | 6    |      | Split Jerk                             |
| <b>MetCon:</b>                                              |                    |             |         |          |      |      |                                        |
| Row                                                         |                    |             | 500m    |          | 1    |      | Row                                    |
| Burpees                                                     |                    |             | 9       |          | 4    |      | Burpees                                |
| Ball Slams                                                  |                    |             | 15      |          | 4    |      | Ball Slams                             |
| Sit-ups with Slam Ball                                      |                    |             | 21      |          | 4    |      | Sit-ups                                |
| Row                                                         |                    |             | 500m    |          | 1    |      | Row                                    |
| Auxiliary:                                                  |                    |             |         |          |      |      |                                        |
| Ring Support Holds                                          |                    |             | 20sec   |          | 4    |      | Ring Support Holds                     |
| Ring Dips                                                   |                    |             | 10-Aug  |          | 4    |      | Ring Dips                              |
| Day 93                                                      |                    |             |         |          |      |      |                                        |
| <b>Strength: 7min EMOM</b>                                  |                    |             |         |          |      |      |                                        |
| C & J@ 70-75%                                               | @ 70-75%           | 7min EMOM   | 2       |          | 7    |      | Clean and Jerk                         |
| <b>MetCon:</b>                                              |                    |             |         |          |      |      |                                        |
| Front Squats (205/135, 155/105)                             | (205/135, 155/105) |             | 6       |          | 5    |      | Squat (Front)                          |
| C2B Pull-ups                                                |                    |             | 6       |          | 5    |      | Pull-ups (C2B)                         |
| Auxiliary:                                                  |                    |             |         |          |      |      |                                        |
| Band Wood Chops                                             |                    |             | 10each  |          | 4    |      | Wood Chops (Band)                      |
| Day 94                                                      |                    |             |         |          |      |      |                                        |
| <b>Strength:</b>                                            |                    |             |         |          |      |      |                                        |
| Squats @80%                                                 | @80%               |             | 2       |          | 6    |      | Squat                                  |
| <b>MetCon:</b>                                              |                    |             |         |          |      |      |                                        |
| Run                                                         |                    |             | 400m    |          | 2    |      | Run                                    |
| HSPU                                                        |                    |             | 15      |          | 2    |      | HSPU                                   |
| Run                                                         |                    |             | 400m    |          | 2    |      | Run                                    |
| HRPU                                                        |                    |             | 15      |          | 2    |      | HRPU                                   |
| Day 95                                                      |                    |             |         |          |      |      |                                        |
| <b>Strength:</b>                                            |                    |             |         |          |      |      |                                        |
| 3 Position Snatch                                           | 3 Position         |             |         |          |      |      | Snatch                                 |
| <b>MetCon:</b>                                              |                    |             |         |          |      |      |                                        |
| DU's                                                        |                    |             | 50      |          | 1    |      | DU's                                   |
| KB Swings (32/24, 24/20)                                    | (32/24, 24/20)     |             | 50      |          | 1    |      | KB Swings                              |
| Sit-ups                                                     |                    |             | 50      |          | 1    |      | Sit-ups                                |
| DU's                                                        |                    |             | 25      |          | 1    |      | DU's                                   |
| KB Swings (32/24, 24/20)                                    | (32/24, 24/20)     |             | 25      |          | 1    |      | KB Swings                              |
| Sit-ups                                                     |                    |             | 25      |          | 1    |      | Sit-ups                                |
| Auxiliary:                                                  |                    |             |         |          |      |      |                                        |
| Rope Pulls                                                  |                    |             | 10      |          | 1    |      | Rope Pulls                             |
| Day 96                                                      |                    |             |         |          |      |      |                                        |
| <b>Strength:</b>                                            |                    |             |         |          |      |      |                                        |
| Deadlifts                                                   |                    |             |         |          |      |      | Deadlift                               |
|                                                             | 60%                |             | 5       |          | 1    |      |                                        |
|                                                             | 70%                |             | 4       |          | 1    |      |                                        |
|                                                             | 80%                |             | 3       |          | 1    |      |                                        |
|                                                             | 85%                |             | 2       |          | 1    |      |                                        |
|                                                             | 80%                |             | 3       |          | 1    |      |                                        |
|                                                             | 70%                |             | 4       |          | 1    |      |                                        |
|                                                             | 60%                |             | 5       |          | 1    |      |                                        |
| <b>MetCon:</b>                                              |                    |             |         |          |      |      |                                        |
| Row                                                         |                    |             | 1500m   |          | 1    |      | Row                                    |
|                                                             |                    |             | 21      |          | 4    |      | Ball Slams                             |
| Wall Balls (30/20, 20/14)                                   | (30/20, 20/14)     |             | 25      |          | 3    |      | Wall Balls                             |
| Ring Rows                                                   |                    |             | 20      |          | 3    |      | Ring Rows                              |
| Goblet Hold Walking Lunge (32/24, 24/20)                    | (32/24, 24/20)     |             | 15paces |          | 3    |      | 3 Lunges (KB Walking)                  |
| Day 97                                                      |                    |             |         |          |      |      |                                        |
| <b>Strength:</b>                                            |                    |             |         |          |      |      |                                        |
| Establish a 3RM Push Press                                  | 3RM                |             |         |          |      |      | Push Press                             |
| <b>MetCon: 18min cap</b>                                    |                    |             |         |          |      |      |                                        |
|                                                             |                    | (18min cap) |         |          |      |      |                                        |

|                                                    | Weights (lbs)            | Time (min)    | Reps    | Distance | Sets  | Sums | NOTES                       |
|----------------------------------------------------|--------------------------|---------------|---------|----------|-------|------|-----------------------------|
| Squat Clean (165/115, 135/85)                      | (165/115, 135/85)        |               | 5       |          | 1     |      | Squat Clean                 |
| Squat Clean (185/125, 155/105)                     | (185/125, 155/105)       |               | 3       |          | 1     |      | Squat Clean                 |
| Squat Clean (225/150, 185/125)                     | (225/150, 185/125)       |               | 1       |          | 1     |      | Squat Clean                 |
| T2B                                                |                          |               | 40      |          | 1     |      | T2B                         |
| Burpee Box Jumps                                   |                          |               | 20      |          | 1     |      | Burpees                     |
| Auxiliary:                                         |                          |               | 20      |          | 1     |      | Box Jumps                   |
| Med Ball Russian Twists                            | Med Balls                |               | 25      |          | 4     |      | Russian Twists              |
| Day 98                                             |                          |               |         |          |       |      |                             |
| <b>Strength:</b>                                   |                          |               |         |          |       |      |                             |
| Rope Climbing Skillz                               |                          |               | 15min   |          | 1     |      | Rope Climbs                 |
| <b>MetCon:</b>                                     |                          |               |         |          |       |      |                             |
| Run Relay                                          |                          |               | 400m    |          | 4     | 3    | Run (Relay)                 |
| Thrusters (115/75)                                 | (115/75)                 |               | 21      |          | 1     |      | Thrusters                   |
| Rope Climbs                                        |                          |               | 12      |          | 1     |      | Rope Climbs                 |
| Thrusters                                          |                          |               | 15      |          | 1     |      | Thrusters                   |
| Rope Climbs                                        |                          |               | 9       |          | 1     |      | Rope Climbs                 |
| Thrusters                                          |                          |               | 9       |          | 1     |      | Thrusters                   |
| Rope CLimbs                                        |                          |               | 6       |          | 1     |      | Rope Climbs                 |
| Run Relay                                          |                          |               | 400m    |          | 4     |      | Run (Relay)                 |
| Day 99                                             |                          |               |         |          |       |      |                             |
| <b>Strength:</b>                                   |                          |               |         |          |       |      |                             |
| DB Bench Press                                     |                          |               | 8       |          | 5     |      | Bench Press (DB)            |
| SA DB/KB Bench Row                                 |                          |               | 8each   |          | 5     | 1    | Bench Row (DB/KB, single)   |
| <b>MetCon:</b>                                     |                          |               |         |          |       |      |                             |
| Row                                                |                          |               | 250m    |          | 4     |      | Row                         |
| SA KB Swing (32/20, 24/16)                         | (32/20, 24/16)           |               | 30      |          | 4     |      | KB Swings (single)          |
| KB Goblet Hold Step-ups (20")                      | (20")                    |               | 20      |          | 4     |      | Step-ups (KB)               |
| Day 100                                            |                          |               |         |          |       |      |                             |
| <b>Strength:</b>                                   |                          |               |         |          |       |      |                             |
| C & J @80%                                         | @80%                     |               | 2       |          | 5     |      | Clean and Jerk              |
| <b>MetCon:</b>                                     |                          |               |         |          |       |      |                             |
| S2OH                                               | (135/85, 95/65)          |               | 21-15-9 |          |       |      | Shoulder 2 Over-Head (S2OH) |
| Pull-ups                                           |                          |               | 21-15-9 |          |       |      | Pull-ups                    |
| Rest                                               | 3 minutes                |               |         |          |       |      |                             |
| Front Squat                                        | (185/125, 135/85)        |               | 15-9-6  |          |       |      | Squat (Front)               |
| Feet elevated Push-ups                             | Feet elevated            |               | 15-9-6  |          |       |      | Push-ups                    |
| Auxiliary:                                         |                          |               |         |          |       |      |                             |
| Anti-rotational Press                              |                          |               | 8each   |          | 4     |      | Press (Anti-rotational)     |
| Day 101                                            |                          |               |         |          |       |      |                             |
| <b>Strength:</b>                                   |                          |               |         |          |       |      |                             |
| Squats @ 80%                                       | @ 80%                    |               | 6       |          | 4     |      | Squat                       |
| <b>MetCon:</b>                                     |                          |               |         |          |       |      |                             |
| Run Relay                                          | (26min cap)              |               | 200m    |          | 8     |      | Run (Relay)                 |
| OHS (135/95, 115/75)                               | (135/95, 115/75)         |               | 50      |          | 1     |      | Squat (Overhead)            |
| Sit-ups                                            |                          |               | 100     |          | 1     |      | Sit-ups                     |
| DU's                                               |                          |               | 150     |          | 1     |      | DU's                        |
| Power Cleans                                       |                          |               | 50      |          | 1     |      | Clean (Power)               |
| Box Jump overs (24/20)                             | (24/20)                  |               | 100     |          | 1     | 1    | Box Jump Overs              |
| Day 102                                            |                          |               |         |          |       |      |                             |
| <b>Strength:</b>                                   |                          |               |         |          |       |      |                             |
| Snatch Catch w/2 sec. pause in bottom +Full bottom | w/2 sec. pause in bottom |               | 2       |          | 5     | 1    | Snatch (Catch)              |
|                                                    |                          |               | 1       |          |       |      | Snatch                      |
| <b>MetCon:</b>                                     |                          |               |         |          |       |      |                             |
| Row                                                |                          |               | 500m    |          | 3     |      | Row                         |
| Burpees                                            |                          |               | 15      |          | 3     |      | Burpees                     |
| KB SA Swing (24/16)                                | (24/16)                  |               | 30      |          | 3     |      | KB Swings (single)          |
| Bar Roll Outs                                      |                          |               | 10      |          | 4     |      | Bar Roll-outs               |
| Day 103                                            |                          |               |         |          |       |      |                             |
| <b>Strength:</b>                                   |                          |               |         |          |       |      |                             |
| Speed DL @70%                                      | @70%                     |               | 5       |          | 6     | 1    | Deadlift (Speed)            |
| <b>MetCon:</b>                                     |                          |               |         |          |       |      |                             |
| HSPU                                               |                          |               | 7       |          | 5     |      | HSPU                        |
| C2B Chin-ups                                       |                          |               | 9       |          | 5     | 1    | Chin-ups (C2B)              |
| Day 104                                            |                          |               |         |          |       |      |                             |
| <b>Strength: 10min. EMOM</b>                       |                          |               |         |          |       |      |                             |
| Bench Press (75-100% of BW)                        | (75-100% of BW)          | 10min. EMOM   |         |          |       |      | Bench Press                 |
| <b>MetCon: 10min. AMRAP</b>                        |                          |               |         |          |       |      |                             |
| Power Cleans (185/125, 135/95)                     | (185/125, 135/95)        | (10min AMRAP) | 10      |          | AMRAP |      | Clean (Power)               |
| Wall Balls                                         |                          |               | 15      |          | AMRAP |      | Wall Balls                  |
| DU's                                               |                          |               | 25      |          | AMRAP |      | DU's                        |
| Auxiliary:                                         |                          |               |         |          |       |      |                             |
| Russian Twists                                     |                          |               | 25      |          | 4     |      | Russian Twists              |
| Day 105                                            |                          |               |         |          |       |      |                             |

|                                                                | Weights (lbs)                                      | Time (min) | Reps        | Distance | Sets | Sums | NOTES                          |
|----------------------------------------------------------------|----------------------------------------------------|------------|-------------|----------|------|------|--------------------------------|
| <b>Strength:</b>                                               |                                                    |            |             |          |      |      |                                |
| Front Squat (starting at 65% increasing load by 5% each round) | (starting at 65% increasing load by 5% each round) |            | 5           |          | 5    |      | Squat (Front)                  |
| <b>MetCon:</b>                                                 |                                                    |            |             |          |      |      |                                |
| Run                                                            |                                                    |            | 400m        |          | 4    |      | Run                            |
| Double KB Jerks (32/20, 24/16)                                 | (32/20, 24/16)                                     |            | 12          |          | 4    |      | Jerk (Double Bell KB)          |
| KB Walking Lunges                                              |                                                    |            | 12          |          | 4    |      | Lunges (KB Walking)            |
| Push-ups w/hands on handles of the bells                       | w/hands on handles of the bells                    |            | 12          |          | 4    |      | Push-ups                       |
| Auxiliary:                                                     |                                                    |            |             |          |      |      |                                |
| Sledge Strikes                                                 |                                                    |            | 20          |          | 4    |      | Sledge Strikes                 |
| TGU                                                            |                                                    |            | 3each       |          | 4    |      | TGU (KB)                       |
| Day 106                                                        |                                                    |            |             |          |      |      |                                |
| <b>Strength:</b>                                               |                                                    |            |             |          |      |      |                                |
| RDL                                                            |                                                    |            | 8           |          | 4    |      | RDL                            |
| Bench KB/DB rows                                               |                                                    |            | 8each       |          | 4    | 1    | Bench Row (KB/DB)              |
| <b>MetCon:</b>                                                 |                                                    |            |             |          |      |      |                                |
| Ring Dips                                                      |                                                    |            | 10          |          | 3    |      | Ring Dips                      |
| T2B                                                            |                                                    |            | 15          |          | 3    |      | T2B                            |
| Ball Slams (30/20, 20/15)                                      | (30/20, 20/15)                                     |            | 20          |          | 3    |      | Ball Slams                     |
| Day 107                                                        |                                                    |            |             |          |      |      |                                |
| <b>Strength:</b>                                               |                                                    |            |             |          |      |      |                                |
| Hang Power Clean + Hang Clean + Front Squat+ Jerk              |                                                    |            | 1           |          | 5    |      | Clean (Hang Power)             |
| <b>MetCon:</b>                                                 |                                                    |            |             |          |      |      |                                |
| Thrusters (135/85, 95/65)                                      | (135/85, 95/65)                                    |            | 15          |          | 3    |      | Thrusters                      |
| Lateral Burpees over the Bar                                   |                                                    |            | 10          |          | 3    |      | Burpees (Lateral Bar Over)     |
| Run                                                            |                                                    |            | 400m        |          | 3    |      | Run                            |
| Auxiliary:                                                     |                                                    |            |             |          |      |      |                                |
| Floor Sweeps                                                   |                                                    |            | 10          |          | 4    |      | Floor Sweeps                   |
| Loaded Glute Bridge                                            | Loaded                                             |            | 10          |          | 4    |      | Glute Bridge                   |
| Day 108                                                        |                                                    |            |             |          |      |      |                                |
| <b>Strength:</b>                                               |                                                    |            |             |          |      |      |                                |
| Squats @85%                                                    | @85%                                               |            | 5           |          | 5    |      | Squat                          |
| <b>MetCon:</b>                                                 |                                                    |            |             |          |      |      |                                |
| Pull-ups                                                       |                                                    |            | 15-9-6-9-15 |          | 5    |      | Pull-ups                       |
| Feet Elevated Push-ups                                         | Feet Elevated (using 2 x 45lb plates)              |            | 15-9-6-9-15 |          | 5    |      | Push-ups                       |
| DU's                                                           |                                                    |            | 15-9-6-9-15 |          | 5    |      | DU's                           |
| Auxiliary:                                                     |                                                    |            |             |          |      |      |                                |
| Row                                                            |                                                    |            | 500m        |          | 4    |      | Row                            |
| Day 109                                                        |                                                    |            |             |          |      |      |                                |
| <b>Strength:</b>                                               |                                                    |            |             |          |      |      |                                |
| Pause Snatch (working up to 80-85%)                            | (working up to 80-85%)                             |            | 2           |          | 6    |      | Snatch (Pause)                 |
| <b>MetCon:</b>                                                 |                                                    |            |             |          |      |      |                                |
| Row                                                            | (25min cap)                                        |            | 1600m       |          | 1    |      | Row                            |
| Hang Power Cleans Pos. #2 (185/125, 135/95)                    | Pos. #2 (185/125, 135/95)                          |            | 25          |          | 1    |      | Clean (Hang Power)             |
| Box Jumps                                                      |                                                    |            | 25          |          | 1    |      | Box Jumps                      |
| Front Rack DB (2) Walking Lunges (40/20, 35/25)                | (40/20, 35/25)                                     |            | 2           |          | 1    | 3    | Lunges (Walking DB Front Rack) |
| Wall Balls (30/20, 20/14)                                      | (30/20, 20/14)                                     |            | 25          |          | 1    |      | Wall Balls                     |
|                                                                |                                                    |            | 25          |          |      |      | Wall Balls                     |
| Wall Ball Sit-ups                                              |                                                    |            | 25          |          |      |      | Sit-ups                        |
| Day 110                                                        |                                                    |            |             |          |      |      |                                |
| <b>Strength:</b>                                               |                                                    |            |             |          |      |      |                                |
| DL (starting @ 65%, increasing load by 5% each round)          | (starting @ 65%, increasing load by 5% each round) |            | 2           |          | 5    |      | Deadlift                       |
| <b>MetCon:</b>                                                 |                                                    |            |             |          |      |      |                                |
| DL (225/155)                                                   | (225/155)                                          |            | 21-15-9     |          | 3    |      | Deadlift                       |
| HSPU                                                           |                                                    |            | 21-15-9     |          | 3    |      | HSPU                           |
| Day 111                                                        |                                                    |            |             |          |      |      |                                |
| <b>Strength:</b>                                               |                                                    |            |             |          |      |      |                                |
| Bench Press                                                    | 60% of BW                                          | 60% of BW  | 10          |          | 1    |      | Bench Press                    |
|                                                                | 70%                                                |            | 8           |          | 1    |      |                                |
|                                                                | 80%                                                |            | 6           |          | 1    |      |                                |
|                                                                | 90%                                                |            | 4           |          | 1    |      |                                |
|                                                                | 100%                                               |            | 2           |          | 1    |      |                                |
| Firebreather Bench press @ BW                                  |                                                    |            | 10          |          | 1    |      | Bench Press                    |
| @110%                                                          |                                                    |            | 8           |          | 1    |      |                                |
| @120%                                                          |                                                    |            | 6           |          | 1    |      |                                |
| @130%                                                          |                                                    |            | 4           |          | 1    |      |                                |
| @140%                                                          |                                                    |            | 2           |          | 1    |      |                                |
| <b>MetCon:</b>                                                 |                                                    |            |             |          |      |      |                                |
|                                                                | (12min AMRAP)                                      |            |             |          |      |      |                                |

|                                                    | Weights (lbs)      | Time (min) | Reps  | Distance | Sets  | Sums | NOTES                       |
|----------------------------------------------------|--------------------|------------|-------|----------|-------|------|-----------------------------|
| Squat Cleans (205/135, 165/115)                    | (205/135, 165/115) |            | 6     |          | AMRAP |      | Squat Clean                 |
| T2B                                                |                    |            | 12    |          | AMRAP |      | T2B                         |
| KB Swings (32/24, 24/20)                           | (32/24, 24/20)     |            | 18    |          | AMRAP |      | KB Swings                   |
| Auxiliary:                                         |                    |            |       |          |       |      |                             |
| Run                                                |                    |            | 1600m |          | 1     |      | Run                         |
| Day 112                                            |                    |            |       |          |       |      |                             |
| <b>Strength:</b>                                   |                    |            |       |          |       |      |                             |
| OHS (As heavy as possible with perfect form. AHAP) |                    |            | 3     |          | 6     |      | Squat (Overhead)            |
| <b>MetCon:</b>                                     |                    |            |       |          |       |      |                             |
| S2OH (155/95, 105/75)                              | (155/95, 105/75)   |            | 9     |          | 4     |      | Shoulder 2 Over-Head (S2OH) |
| Box Jumps                                          |                    |            | 15    |          | 4     |      | Box Jumps                   |
| Run                                                |                    |            | 200m  |          | 4     |      | Run                         |
| Auxiliary:                                         |                    |            |       |          |       |      |                             |
| Farmer Walks                                       |                    |            | 100m  |          | 4     |      | Farmer Walks                |
| Sledge Strikes                                     |                    |            | 20    |          | 4     |      | Sledge Strikes              |
